# Supplementary material for: Identification of molecular subtypes based on inflammatory response in lower-grade glioma
Source: Inflamm Regen. 2022 Oct 1;42:29. doi: 10.1186/s41232-022-00215-9 (PMC9526248; doi:10.1186/s41232-022-00215-9)
Supplement: Supplementary file 1 — Additional file 1. The clinical information of LGG patients obtained from TCGA, CGGA, and GEO database. [file 41232_2022_215_MOESM1_ESM.xls]

## Sheet: TCGA
TCGA_ID	Histology	Grade	Age	Gender	OS (year)	OS_status	PFS (year)	FPS_status	IDH status	1p/19q codeletion	MGMT promoter status	TERT promoter status	TERT expression status	ATRX status
TCGA-CS-4938	astrocytoma	G2	>30<=50	female	9.79178	0	9.79178	0	Mutant	non-codel	Unmethylated	wildtype	Not expressed	Mutant
TCGA-CS-4941	astrocytoma	G3	>50<=70	male	0.641096	1	0.0246575	1	wildtype	non-codel	Methylated	Mutant	Expressed	wildtype
TCGA-CS-4942	astrocytoma	G3	>30<=50	female	3.65753	1	3.24384	1	Mutant	non-codel	Unmethylated	wildtype	Not expressed	Mutant
TCGA-CS-4943	astrocytoma	G3	>30<=50	male	3.03014	1	3.03014	1	Mutant	non-codel	Methylated	wildtype	Not expressed	Mutant
TCGA-CS-4944	astrocytoma	G2	>30<=50	male	5.00822	0	5.00822	0	Mutant	non-codel	Methylated	Mutant	Expressed	wildtype
TCGA-CS-5393	astrocytoma	G3	>30<=50	male	3.34795	0	3.34795	0	Mutant	non-codel	Methylated	wildtype	Not expressed	wildtype
TCGA-CS-5394	astrocytoma	G3	>30<=50	male	0.0219178	0	0.0219178	0	Mutant	non-codel	Methylated	wildtype	Not expressed	wildtype
TCGA-CS-5395	oligodendroglioma	G2	>30<=50	male	1.75068	1	0.786301	1	wildtype	non-codel	Unmethylated	Mutant	Expressed	wildtype
TCGA-CS-5396	oligodendroglioma	G3	>50<=70	female	4.46849	0	4.46849	0	Mutant	codel	Methylated	Mutant	Expressed	wildtype
TCGA-CS-5397	astrocytoma	G3	>50<=70	female	0.531507	1	0.531507	1	wildtype	non-codel	Unmethylated	Mutant	Expressed	wildtype
TCGA-CS-6186	oligoastrocytoma	G3	>50<=70	male	1.47397	1	0.515068	1	wildtype	non-codel	Unmethylated	Mutant	Expressed	wildtype
TCGA-CS-6188	astrocytoma	G3	>30<=50	male	2.23014	1	1.7726	1	wildtype	non-codel	Unmethylated	Mutant	Expressed	wildtype
TCGA-CS-6290	astrocytoma	G3	>30<=50	male	3.11507	1	3.11507	0	Mutant	non-codel	Methylated	wildtype	Not expressed	wildtype
TCGA-CS-6666	astrocytoma	G3	<=30	male	3.91233	0	3.91233	0	Mutant	non-codel	Methylated	wildtype	Not expressed	Mutant
TCGA-CS-6667	astrocytoma	G2	>30<=50	female	4.02466	0	4.02466	0	Mutant	non-codel	Methylated	wildtype	Not expressed	wildtype
TCGA-CS-6668	oligodendroglioma	G2	>50<=70	female	4.16164	0	4.16164	0	Mutant	codel	Methylated	Mutant	Expressed	wildtype
TCGA-CS-6669	oligodendroglioma	G2	<=30	female	4.09315	0	4.09315	0	wildtype	non-codel	Unmethylated	wildtype	Not expressed	wildtype
TCGA-CS-6670	oligodendroglioma	G3	>30<=50	male	3.90685	0	3.90685	0	Mutant	codel	Methylated	NA	Expressed	wildtype
TCGA-DB-5270	oligoastrocytoma	G3	>30<=50	female	10.2274	0	10.2274	0	Mutant	non-codel	Methylated	NA	Not expressed	Mutant
TCGA-DB-5273	astrocytoma	G3	>30<=50	male	6.83014	0	6.83014	0	Mutant	non-codel	Unmethylated	wildtype	Not expressed	Mutant
TCGA-DB-5274	oligoastrocytoma	G3	>30<=50	female	6.27123	0	6.27123	0	Mutant	codel	Methylated	Mutant	Expressed	wildtype
TCGA-DB-5275	oligoastrocytoma	G3	>30<=50	male	3.99452	0	3.99452	0	Mutant	non-codel	Methylated	wildtype	Not expressed	Mutant
TCGA-DB-5277	astrocytoma	G3	>30<=50	male	4.23836	1	3.16712	1	Mutant	non-codel	Methylated	wildtype	Not expressed	wildtype
TCGA-DB-5278	oligodendroglioma	G2	<=30	male	7.59452	0	1.38904	1	Mutant	codel	Methylated	wildtype	Not expressed	wildtype
TCGA-DB-5279	oligodendroglioma	G2	>50<=70	male	3.70959	0	1.90411	1	Mutant	codel	Methylated	Mutant	Expressed	wildtype
TCGA-DB-5280	oligoastrocytoma	G2	>30<=50	male	3.04658	0	3.04658	0	Mutant	non-codel	Methylated	wildtype	Not expressed	Mutant
TCGA-DB-5281	oligoastrocytoma	G3	>50<=70	male	6.52329	0	6.52329	0	Mutant	non-codel	Methylated	wildtype	Not expressed	Mutant
TCGA-DB-A4X9	oligoastrocytoma	G2	>30<=50	female	3.86849	0	1.3726	1	Mutant	non-codel	Methylated	wildtype	Not expressed	wildtype
TCGA-DB-A4XA	oligoastrocytoma	G2	<=30	male	1.56986	0	1.56986	0	Mutant	codel	Methylated	Mutant	Expressed	wildtype
TCGA-DB-A4XB	astrocytoma	G3	>30<=50	male	2.51781	0	2.51781	0	Mutant	non-codel	Methylated	wildtype	Not expressed	wildtype
TCGA-DB-A4XC	oligoastrocytoma	G2	<=30	male	3.89315	0	3.89315	0	Mutant	non-codel	Methylated	wildtype	Not expressed	Mutant
TCGA-DB-A4XD	astrocytoma	G3	>30<=50	male	3.31507	0	3.31507	0	Mutant	non-codel	Methylated	wildtype	Not expressed	Mutant
TCGA-DB-A4XE	oligoastrocytoma	G3	<=30	female	3.12055	0	3.12055	0	Mutant	non-codel	Methylated	wildtype	Not expressed	Mutant
TCGA-DB-A4XF	astrocytoma	G3	>30<=50	female	2.79726	0	1.28219	1	Mutant	non-codel	Methylated	wildtype	Not expressed	wildtype
TCGA-DB-A4XG	oligodendroglioma	G3	>30<=50	male	6.07945	0	6.07945	0	Mutant	codel	Methylated	Mutant	Expressed	wildtype
TCGA-DB-A4XH	oligoastrocytoma	G2	>50<=70	female	2.63562	0	2.63562	0	Mutant	codel	Methylated	Mutant	Expressed	wildtype
TCGA-DB-A64L	oligodendroglioma	G2	>50<=70	female	2.01644	0	1.98356	1	Mutant	codel	Methylated	Mutant	Expressed	wildtype
TCGA-DB-A64O	oligoastrocytoma	G2	>50<=70	male	2.12329	1	1.17808	1	wildtype	non-codel	Unmethylated	Mutant	Expressed	wildtype
TCGA-DB-A64P	oligodendroglioma	G3	>30<=50	male	2.50959	0	2.50959	0	Mutant	codel	Methylated	Mutant	Expressed	wildtype
TCGA-DB-A64Q	oligoastrocytoma	G2	>30<=50	female	0.49863	0	0.49863	0	Mutant	codel	Methylated	Mutant	Not expressed	wildtype
TCGA-DB-A64R	oligodendroglioma	G2	<=30	female	2.61644	0	2.61644	0	Mutant	codel	Methylated	Mutant	Expressed	wildtype
TCGA-DB-A64S	oligoastrocytoma	G2	<=30	male	2.28767	0	2.28767	0	Mutant	non-codel	Unmethylated	wildtype	Not expressed	Mutant
TCGA-DB-A64U	oligoastrocytoma	G2	>30<=50	female	2.31781	0	2.31781	0	Mutant	codel	Methylated	Mutant	Expressed	wildtype
TCGA-DB-A64V	oligodendroglioma	G2	>50<=70	male	2.43562	0	2.43562	0	Mutant	codel	Methylated	Mutant	Not expressed	wildtype
TCGA-DB-A64W	oligoastrocytoma	G3	>50<=70	female	1.2	1	1.2	0	Mutant	codel	Methylated	Mutant	Expressed	wildtype
TCGA-DB-A64X	astrocytoma	G3	>50<=70	female	1.54247	0	1.54247	0	Mutant	non-codel	Methylated	wildtype	Not expressed	wildtype
TCGA-DB-A75K	oligoastrocytoma	G3	>50<=70	female	1.00822	0	1.00822	0	Mutant	codel	Methylated	NA	Expressed	wildtype
TCGA-DB-A75L	astrocytoma	G3	>30<=50	female	0.936986	0	0.936986	0	Mutant	non-codel	Methylated	NA	Not expressed	wildtype
TCGA-DB-A75M	astrocytoma	G2	>30<=50	male	1.49041	0	1.49041	0	Mutant	non-codel	Methylated	NA	Not expressed	Mutant
TCGA-DB-A75O	astrocytoma	G3	<=30	male	2.56164	0	2.56164	0	Mutant	non-codel	Methylated	NA	Not expressed	wildtype
TCGA-DB-A75P	astrocytoma	G2	<=30	female	1.34795	0	1.34795	0	wildtype	non-codel	Unmethylated	NA	Not expressed	wildtype
TCGA-DH-5140	oligoastrocytoma	G3	>30<=50	female	1.66301	1	1.66301	1	wildtype	non-codel	Unmethylated	wildtype	Not expressed	wildtype
TCGA-DH-5141	oligodendroglioma	G3	>30<=50	male	2.65205	0	2.65205	0	Mutant	codel	Methylated	Mutant	Expressed	wildtype
TCGA-DH-5142	astrocytoma	G3	<=30	male	5.32329	0	4.45753	1	Mutant	non-codel	Methylated	wildtype	Not expressed	Mutant
TCGA-DH-5143	oligoastrocytoma	G3	<=30	male	3.83836	0	3.83836	0	Mutant	non-codel	Methylated	wildtype	Not expressed	wildtype
TCGA-DH-5144	oligodendroglioma	G3	>50<=70	female	2.04932	0	2.04932	0	Mutant	codel	Methylated	Mutant	Expressed	Mutant
TCGA-DH-A669	oligodendroglioma	G3	>50<=70	male	2.51781	1	0.712329	1	Mutant	codel	Methylated	Mutant	Expressed	wildtype
TCGA-DH-A66B	astrocytoma	G3	>50<=70	male	3.50411	0	3.50411	0	Mutant	non-codel	Methylated	wildtype	Not expressed	wildtype
TCGA-DH-A66D	astrocytoma	G3	>30<=50	female	2.31781	0	2.31781	0	Mutant	non-codel	Methylated	NA	Not expressed	Mutant
TCGA-DH-A66F	oligodendroglioma	G2	>30<=50	male	1.43288	0	1.43288	0	Mutant	codel	Methylated	Mutant	Expressed	wildtype
TCGA-DH-A66G	oligodendroglioma	G3	>30<=50	female	1.43288	0	1.43288	0	Mutant	non-codel	Methylated	NA	NA	Mutant
TCGA-DH-A7UR	oligodendroglioma	G3	>50<=70	female	4.52055	0	4.52055	0	Mutant	codel	Methylated	NA	Expressed	wildtype
TCGA-DH-A7US	oligodendroglioma	G2	>30<=50	male	1.93425	0	1.93425	0	Mutant	codel	Methylated	NA	Expressed	wildtype
TCGA-DH-A7UT	astrocytoma	G3	<=30	male	1.45479	1	1.10685	1	Mutant	non-codel	Methylated	NA	Not expressed	wildtype
TCGA-DH-A7UU	astrocytoma	G3	>30<=50	male	1.14247	0	1.14247	0	Mutant	non-codel	Methylated	NA	Not expressed	wildtype
TCGA-DH-A7UV	astrocytoma	G3	>30<=50	male	1.55068	0	1.55068	0	Mutant	non-codel	Methylated	NA	Not expressed	Mutant
TCGA-DU-5847	astrocytoma	G3	>30<=50	female	1.50137	0	1.50137	0	wildtype	non-codel	Methylated	Mutant	Expressed	wildtype
TCGA-DU-5849	oligodendroglioma	G2	>30<=50	male	1.2137	0	1.2137	0	Mutant	codel	Methylated	Mutant	Expressed	wildtype
TCGA-DU-5852	oligoastrocytoma	G3	>50<=70	female	0.561644	1	0.0657534	1	wildtype	non-codel	Methylated	Mutant	Expressed	Mutant
TCGA-DU-5853	oligoastrocytoma	G2	<=30	male	1.11507	0	1.11507	0	Mutant	non-codel	Methylated	wildtype	Not expressed	Mutant
TCGA-DU-5854	astrocytoma	G3	>50<=70	female	0.70411	0	0.553425	1	wildtype	non-codel	Unmethylated	Mutant	Expressed	wildtype
TCGA-DU-5855	oligoastrocytoma	G3	>30<=50	female	0.567123	0	0.567123	0	Mutant	non-codel	Methylated	wildtype	Not expressed	Mutant
TCGA-DU-5870	oligodendroglioma	G2	>30<=50	female	15.1945	0	11.9096	1	Mutant	codel	Methylated	Mutant	Expressed	wildtype
TCGA-DU-5871	oligoastrocytoma	G2	>30<=50	female	1.57808	0	1.57808	0	Mutant	non-codel	Methylated	wildtype	Not expressed	Mutant
TCGA-DU-5872	oligoastrocytoma	G2	>30<=50	female	1.45753	0	0.726027	1	Mutant	non-codel	Methylated	wildtype	Not expressed	Mutant
TCGA-DU-5874	oligodendroglioma	G2	>50<=70	female	1.26301	0	1.26301	0	Mutant	codel	Methylated	Mutant	Expressed	wildtype
TCGA-DU-6392	astrocytoma	G3	>30<=50	female	17.5973	0	2.60274	1	wildtype	non-codel	Unmethylated	NA	Not expressed	Mutant
TCGA-DU-6393	oligodendroglioma	G3	>50<=70	male	4.34247	1	4.34247	0	Mutant	codel	Methylated	Mutant	Expressed	wildtype
TCGA-DU-6394	oligodendroglioma	G3	>50<=70	male	1.86849	1	0.967123	1	Mutant	codel	Methylated	Mutant	Not expressed	wildtype
TCGA-DU-6395	oligoastrocytoma	G2	>30<=50	male	4.08493	1	3.27945	1	Mutant	non-codel	Methylated	NA	Not expressed	Mutant
TCGA-DU-6396	oligoastrocytoma	G3	>30<=50	female	6.26301	1	0.290411	1	Mutant	non-codel	Methylated	wildtype	Not expressed	Mutant
TCGA-DU-6397	oligodendroglioma	G3	>30<=50	male	3.83836	1	2.29315	1	Mutant	codel	Methylated	Mutant	Expressed	wildtype
TCGA-DU-6399	oligodendroglioma	G2	>50<=70	male	5.47945	1	4.46301	1	Mutant	non-codel	Methylated	wildtype	Not expressed	Mutant
TCGA-DU-6400	oligodendroglioma	G2	>50<=70	female	0.10137	1	0.10137	1	Mutant	codel	Methylated	Mutant	Expressed	wildtype
TCGA-DU-6401	oligodendroglioma	G2	>30<=50	female	7.28767	1	5.16712	1	Mutant	non-codel	Methylated	wildtype	Not expressed	Mutant
TCGA-DU-6402	astrocytoma	G3	>50<=70	male	0.586301	1	0.282192	1	wildtype	non-codel	Unmethylated	Mutant	Expressed	wildtype
TCGA-DU-6403	oligoastrocytoma	G3	>50<=70	female	0.969863	1	0.969863	1	wildtype	non-codel	Unmethylated	Mutant	Expressed	wildtype
TCGA-DU-6404	oligodendroglioma	G3	<=30	female	11.1452	1	3.16164	1	wildtype	non-codel	Unmethylated	wildtype	Not expressed	wildtype
TCGA-DU-6405	astrocytoma	G3	>50<=70	female	1.65753	1	1.33151	1	wildtype	non-codel	Methylated	Mutant	Expressed	wildtype
TCGA-DU-6406	oligoastrocytoma	G3	>50<=70	female	1.40274	1	1.40274	0	wildtype	non-codel	Unmethylated	NA	Expressed	wildtype
TCGA-DU-6407	oligodendroglioma	G2	>30<=50	female	7.87671	1	6.56712	1	Mutant	non-codel	Methylated	wildtype	Not expressed	Mutant
TCGA-DU-6408	oligodendroglioma	G3	<=30	female	9.50685	1	5.74521	1	Mutant	non-codel	Methylated	wildtype	Not expressed	Mutant
TCGA-DU-6410	oligodendroglioma	G3	>50<=70	male	0.663014	0	0.663014	0	Mutant	codel	Methylated	Mutant	Expressed	wildtype
TCGA-DU-6542	oligoastrocytoma	G3	<=30	male	0.2	0	0.2	0	Mutant	non-codel	Methylated	wildtype	Not expressed	wildtype
TCGA-DU-7006	astrocytoma	G3	>50<=70	female	0.956164	1	0.956164	1	wildtype	non-codel	Methylated	Mutant	Expressed	wildtype
TCGA-DU-7007	astrocytoma	G2	>30<=50	male	5.24658	1	5.24658	0	Mutant	non-codel	Methylated	wildtype	Not expressed	Mutant
TCGA-DU-7008	oligodendroglioma	G2	>30<=50	female	13.0192	0	0.90411	1	Mutant	non-codel	Methylated	wildtype	Not expressed	Mutant
TCGA-DU-7009	oligodendroglioma	G2	>30<=50	female	12.863	1	8.10959	1	Mutant	codel	Methylated	Mutant	Expressed	wildtype
TCGA-DU-7010	astrocytoma	G3	>50<=70	female	1.24932	1	0.528767	1	Mutant	non-codel	Methylated	wildtype	Not expressed	wildtype
TCGA-DU-7011	oligoastrocytoma	G2	<=30	male	8.76712	1	8.76712	1	Mutant	non-codel	Unmethylated	NA	Not expressed	Mutant
TCGA-DU-7012	astrocytoma	G3	>70	female	0.545205	1	0.545205	1	wildtype	non-codel	Methylated	Mutant	Expressed	wildtype
TCGA-DU-7013	astrocytoma	G3	>50<=70	male	0.736986	1	0.512329	1	wildtype	non-codel	Unmethylated	Mutant	Expressed	wildtype
TCGA-DU-7014	oligodendroglioma	G2	>50<=70	male	9.78356	1	9.41644	1	NA	non-codel	Methylated	NA	Not expressed	NA
TCGA-DU-7015	oligodendroglioma	G2	>30<=50	female	7.56438	0	1.61918	1	Mutant	non-codel	Methylated	wildtype	Not expressed	Mutant
TCGA-DU-7018	oligodendroglioma	G3	>50<=70	female	2.55616	1	0.926027	1	Mutant	codel	Methylated	Mutant	Expressed	wildtype
TCGA-DU-7019	oligoastrocytoma	NA	>30<=50	male	2.19178	0	2.19178	0	Mutant	non-codel	Methylated	wildtype	Not expressed	wildtype
TCGA-DU-7290	astrocytoma	G3	>30<=50	female	0.863014	1	0.863014	1	wildtype	non-codel	Unmethylated	Mutant	Not expressed	wildtype
TCGA-DU-7292	astrocytoma	G3	>50<=70	male	0.663014	1	0.249315	1	wildtype	non-codel	Methylated	wildtype	Not expressed	wildtype
TCGA-DU-7294	oligodendroglioma	G2	>50<=70	female	7.86027	0	7.86027	0	Mutant	codel	Methylated	Mutant	Expressed	wildtype
TCGA-DU-7298	astrocytoma	G3	>30<=50	female	1.57808	1	0.547945	1	Mutant	non-codel	Methylated	wildtype	Not expressed	Mutant
TCGA-DU-7299	astrocytoma	G3	>30<=50	male	3.66849	1	1.84932	1	Mutant	non-codel	Methylated	wildtype	Not expressed	wildtype
TCGA-DU-7300	oligodendroglioma	G3	>50<=70	female	5.16712	1	0.868493	1	Mutant	codel	Methylated	Mutant	Expressed	wildtype
TCGA-DU-7301	oligodendroglioma	G2	>50<=70	male	2.1589	1	1.00274	1	Mutant	non-codel	Methylated	wildtype	Expressed	Mutant
TCGA-DU-7302	oligodendroglioma	G3	>30<=50	female	5.02466	0	3.76438	1	Mutant	codel	Methylated	Mutant	Expressed	wildtype
TCGA-DU-7304	oligoastrocytoma	G3	>30<=50	male	1.94247	1	0.846575	1	Mutant	non-codel	Methylated	wildtype	Not expressed	Mutant
TCGA-DU-7306	oligoastrocytoma	G2	>50<=70	male	3.49863	0	3.42466	1	Mutant	non-codel	Methylated	wildtype	Not expressed	Mutant
TCGA-DU-7309	oligodendroglioma	G3	>30<=50	female	0.230137	0	0.230137	0	Mutant	non-codel	Methylated	wildtype	Not expressed	Mutant
TCGA-DU-8158	astrocytoma	G3	>50<=70	female	0.424658	1	0.424658	1	wildtype	non-codel	Unmethylated	Mutant	Not expressed	wildtype
TCGA-DU-8161	oligoastrocytoma	G3	>50<=70	female	1.97808	1	0.30411	1	wildtype	non-codel	Unmethylated	Mutant	Not expressed	wildtype
TCGA-DU-8162	oligoastrocytoma	G3	>50<=70	female	1.21644	1	1.10137	1	wildtype	non-codel	Unmethylated	wildtype	Not expressed	wildtype
TCGA-DU-8163	oligoastrocytoma	G3	<=30	male	1.72329	0	1.39452	1	Mutant	non-codel	Unmethylated	wildtype	Not expressed	Mutant
TCGA-DU-8164	oligodendroglioma	G2	>50<=70	male	1.78356	0	1.78356	0	Mutant	codel	Methylated	Mutant	Expressed	wildtype
TCGA-DU-8165	oligodendroglioma	G3	>50<=70	female	1.59452	0	1.59452	0	wildtype	non-codel	Unmethylated	Mutant	Expressed	wildtype
TCGA-DU-8166	oligoastrocytoma	G2	<=30	female	1.4137	0	0.528767	1	Mutant	non-codel	Methylated	wildtype	Not expressed	Mutant
TCGA-DU-8167	oligoastrocytoma	G2	>50<=70	female	1.29041	0	1.29041	0	Mutant	non-codel	Methylated	wildtype	Not expressed	wildtype
TCGA-DU-8168	oligodendroglioma	G3	>50<=70	female	1.18082	0	1.18082	0	Mutant	codel	Methylated	Mutant	Expressed	wildtype
TCGA-DU-A5TP	astrocytoma	G3	>30<=50	male	2.7726	0	0.556164	1	Mutant	non-codel	Methylated	wildtype	Not expressed	Mutant
TCGA-DU-A5TR	oligoastrocytoma	G2	>50<=70	male	2.48767	0	2.32329	1	Mutant	non-codel	Methylated	wildtype	Not expressed	Mutant
TCGA-DU-A5TS	oligodendroglioma	G2	>30<=50	male	2.6411	0	1.50959	1	Mutant	non-codel	Methylated	wildtype	Not expressed	Mutant
TCGA-DU-A5TT	oligodendroglioma	G3	>50<=70	male	2.03562	0	1.6	1	wildtype	non-codel	Methylated	Mutant	Expressed	wildtype
TCGA-DU-A5TU	astrocytoma	G2	>50<=70	female	2.18082	0	0.509589	1	Mutant	non-codel	Methylated	wildtype	Not expressed	Mutant
TCGA-DU-A5TW	astrocytoma	G3	>30<=50	female	2.08219	0	2.08219	0	Mutant	non-codel	Methylated	wildtype	Not expressed	Mutant
TCGA-DU-A5TY	astrocytoma	G3	>30<=50	female	2.83014	1	1.4411	1	wildtype	non-codel	Methylated	Mutant	Expressed	wildtype
TCGA-DU-A6S2	oligodendroglioma	G2	>30<=50	female	2.12877	0	2.12877	0	Mutant	codel	Methylated	NA	Expressed	wildtype
TCGA-DU-A6S3	oligodendroglioma	G2	>50<=70	male	1.79726	0	1.79726	0	Mutant	codel	Methylated	NA	Expressed	wildtype
TCGA-DU-A6S6	oligoastrocytoma	G2	>30<=50	female	7.92603	0	6.21096	1	Mutant	codel	Methylated	NA	Expressed	wildtype
TCGA-DU-A6S7	astrocytoma	G3	<=30	female	1.74795	0	1.74795	0	Mutant	non-codel	Methylated	NA	Not expressed	Mutant
TCGA-DU-A6S8	oligodendroglioma	G3	>70	female	1.85753	0	1.75616	1	Mutant	codel	Methylated	NA	Expressed	wildtype
TCGA-DU-A76K	oligodendroglioma	G2	>70	male	0.950685	1	0.556164	1	wildtype	non-codel	Unmethylated	NA	Expressed	wildtype
TCGA-DU-A76L	oligodendroglioma	G3	>50<=70	male	2.23014	1	1.12329	1	wildtype	non-codel	Methylated	NA	Expressed	wildtype
TCGA-DU-A76O	astrocytoma	G2	<=30	male	1.43014	0	1.43014	0	Mutant	non-codel	Methylated	NA	Not expressed	Mutant
TCGA-DU-A76R	oligodendroglioma	G3	>50<=70	male	1.77534	1	0.926027	1	Mutant	codel	Methylated	NA	Expressed	wildtype
TCGA-DU-A7T6	oligodendroglioma	G3	>70	female	1.49863	1	1.49863	1	Mutant	codel	Methylated	NA	Expressed	wildtype
TCGA-DU-A7T8	oligoastrocytoma	G3	>30<=50	male	11.5863	1	8.24384	1	Mutant	non-codel	Methylated	NA	Not expressed	Mutant
TCGA-DU-A7TA	oligodendroglioma	G2	>30<=50	male	7.0274	0	7.0274	0	Mutant	non-codel	Methylated	NA	Not expressed	Mutant
TCGA-DU-A7TB	oligodendroglioma	G2	>50<=70	male	4.29315	0	0.20274	1	wildtype	non-codel	Unmethylated	NA	Expressed	wildtype
TCGA-DU-A7TC	astrocytoma	G2	>30<=50	male	3.11507	0	3.05205	1	Mutant	non-codel	Methylated	NA	Not expressed	wildtype
TCGA-DU-A7TD	oligoastrocytoma	G3	>50<=70	male	0.624658	1	0.515068	1	wildtype	non-codel	Unmethylated	NA	Expressed	wildtype
TCGA-DU-A7TG	oligodendroglioma	G2	>30<=50	male	3.70137	1	3.70137	0	Mutant	non-codel	Methylated	NA	Not expressed	wildtype
TCGA-DU-A7TI	NA	G3	>30<=50	NA	3.2411	1	2.25205	1	NA	non-codel	Methylated	NA	Not expressed	NA
TCGA-DU-A7TJ	astrocytoma	G3	>50<=70	male	0.0465753	0	0.0465753	0	wildtype	non-codel	Methylated	NA	Expressed	wildtype
TCGA-E1-5302	astrocytoma	G3	>30<=50	male	4.17808	1	3.40274	1	Mutant	non-codel	Methylated	wildtype	Not expressed	Mutant
TCGA-E1-5303	astrocytoma	G3	>30<=50	male	5.62192	1	0.427397	1	Mutant	non-codel	Methylated	wildtype	Not expressed	Mutant
TCGA-E1-5304	astrocytoma	G3	>30<=50	male	3.4274	1	2.47397	1	Mutant	non-codel	Unmethylated	wildtype	Not expressed	Mutant
TCGA-E1-5305	astrocytoma	G3	>30<=50	male	6.66575	1	4.39452	1	Mutant	non-codel	Methylated	wildtype	Not expressed	Mutant
TCGA-E1-5307	astrocytoma	G3	>50<=70	female	4.8274	1	3.97808	1	Mutant	non-codel	Methylated	wildtype	Not expressed	Mutant
TCGA-E1-5311	oligodendroglioma	G3	>30<=50	male	11.189	1	7.12877	1	Mutant	codel	Methylated	Mutant	Expressed	wildtype
TCGA-E1-5318	oligodendroglioma	G2	>30<=50	female	6.51781	1	0.991781	1	Mutant	codel	Methylated	Mutant	Expressed	wildtype
TCGA-E1-5319	oligodendroglioma	G2	>30<=50	female	7.96438	1	2.52877	1	Mutant	codel	Methylated	Mutant	Expressed	wildtype
TCGA-E1-5322	oligoastrocytoma	G2	>30<=50	female	10.8986	1	2.9726	1	Mutant	non-codel	Methylated	Mutant	Not expressed	Mutant
TCGA-E1-A7YD	NA	G3	>50<=70	NA	1.19178	1	0.778082	1	wildtype	non-codel	Unmethylated	NA	Expressed	wildtype
TCGA-E1-A7YE	NA	G3	>30<=50	NA	2.4274	1	0.515068	1	Mutant	non-codel	Unmethylated	NA	Not expressed	Mutant
TCGA-E1-A7YH	NA	G3	>30<=50	NA	7.76712	1	1.88767	1	Mutant	non-codel	Methylated	NA	Not expressed	Mutant
TCGA-E1-A7YI	NA	G3	>30<=50	NA	0.30411	1	0.153425	1	Mutant	non-codel	Methylated	NA	Not expressed	Mutant
TCGA-E1-A7YJ	NA	G3	>50<=70	NA	1.62192	1	1.4137	1	wildtype	non-codel	Unmethylated	NA	Expressed	wildtype
TCGA-E1-A7YK	NA	G3	>50<=70	NA	1.03562	1	1.03562	0	Mutant	non-codel	Methylated	NA	Not expressed	Mutant
TCGA-E1-A7YL	NA	G3	>30<=50	NA	1.34795	1	0.249315	1	wildtype	non-codel	Unmethylated	NA	Expressed	wildtype
TCGA-E1-A7YM	NA	G3	>50<=70	NA	1.77534	1	0.241096	1	wildtype	non-codel	Unmethylated	NA	Expressed	wildtype
TCGA-E1-A7YN	NA	G3	>50<=70	NA	1.99178	1	1.15068	1	wildtype	non-codel	Methylated	NA	Not expressed	wildtype
TCGA-E1-A7YO	oligodendroglioma	G3	>30<=50	male	6.25205	1	5.41644	1	Mutant	codel	Methylated	NA	Expressed	wildtype
TCGA-E1-A7YQ	NA	G3	>50<=70	NA	4.32329	1	1.58904	1	wildtype	non-codel	Unmethylated	NA	Expressed	wildtype
TCGA-E1-A7YS	NA	G3	>70	NA	1.27671	1	1.27671	1	Mutant	codel	Methylated	NA	Expressed	wildtype
TCGA-E1-A7YU	NA	G3	>30<=50	NA	0.0630137	1	0.0630137	1	Mutant	non-codel	Methylated	NA	Not expressed	wildtype
TCGA-E1-A7YV	oligoastrocytoma	G3	<=30	female	2.70411	1	0.265753	1	Mutant	non-codel	Methylated	NA	Not expressed	Mutant
TCGA-E1-A7YW	oligoastrocytoma	G2	<=30	male	3.06849	1	1.12055	1	Mutant	non-codel	Methylated	NA	Not expressed	Mutant
TCGA-E1-A7YY	NA	G2	<=30	NA	12.1781	1	2.62466	1	Mutant	non-codel	Methylated	NA	Expressed	wildtype
TCGA-E1-A7Z2	NA	G2	>50<=70	NA	1.09041	1	0.583562	1	wildtype	non-codel	Unmethylated	NA	Expressed	wildtype
TCGA-E1-A7Z3	NA	G2	>30<=50	NA	6.12329	1	4.29863	1	Mutant	non-codel	Methylated	NA	Not expressed	Mutant
TCGA-E1-A7Z4	NA	G2	>30<=50	NA	12.0877	1	2.31781	1	Mutant	non-codel	Methylated	NA	Not expressed	Mutant
TCGA-E1-A7Z6	astrocytoma	G2	>30<=50	female	2.69589	1	0.805479	1	Mutant	non-codel	Methylated	NA	Not expressed	Mutant
TCGA-EZ-7264	oligodendroglioma	G2	>30<=50	female	3.29041	0	3.29041	0	Mutant	codel	Methylated	Mutant	Expressed	wildtype
TCGA-F6-A8O3	oligodendroglioma	G2	>30<=50	male	0.0191781	0	0.0191781	0	Mutant	codel	Methylated	NA	Expressed	wildtype
TCGA-F6-A8O4	astrocytoma	G2	>30<=50	male	0.0164384	0	0.0164384	0	Mutant	non-codel	Methylated	NA	Not expressed	Mutant
TCGA-FG-5962	oligodendroglioma	G3	>50<=70	male	3.98082	0	3.98082	0	Mutant	codel	Methylated	Mutant	Expressed	wildtype
TCGA-FG-5963	astrocytoma	G3	<=30	male	2.12329	1	1.08219	1	wildtype	non-codel	Unmethylated	wildtype	Not expressed	Mutant
TCGA-FG-5964	oligodendroglioma	G2	>50<=70	male	4.35068	0	4.35068	0	Mutant	codel	Methylated	Mutant	Expressed	wildtype
TCGA-FG-5965	oligoastrocytoma	G2	>30<=50	female	3.06849	1	1.9589	1	Mutant	non-codel	Methylated	wildtype	Not expressed	Mutant
TCGA-FG-6688	astrocytoma	G3	>50<=70	female	1.56438	0	1.10959	1	wildtype	non-codel	Methylated	Mutant	Not expressed	wildtype
TCGA-FG-6689	astrocytoma	G2	<=30	male	1.24384	0	0.326027	1	Mutant	non-codel	Methylated	NA	Not expressed	Mutant
TCGA-FG-6690	oligodendroglioma	G2	>50<=70	male	3.54521	0	3.54521	0	Mutant	non-codel	Methylated	wildtype	Not expressed	Mutant
TCGA-FG-6691	astrocytoma	G2	<=30	female	3.44384	0	2.50137	1	Mutant	non-codel	Unmethylated	wildtype	Not expressed	Mutant
TCGA-FG-6692	oligodendroglioma	G3	>50<=70	male	1.53699	1	1.53699	1	wildtype	non-codel	Methylated	Mutant	Expressed	wildtype
TCGA-FG-7634	oligodendroglioma	G2	<=30	male	1.27945	0	1.27945	0	Mutant	codel	Methylated	Mutant	Expressed	wildtype
TCGA-FG-7636	astrocytoma	G3	>30<=50	male	1.49041	0	1.49041	0	Mutant	non-codel	Methylated	wildtype	Not expressed	Mutant
TCGA-FG-7637	oligoastrocytoma	G2	>30<=50	male	3.33973	0	3.33973	0	Mutant	non-codel	Methylated	wildtype	Not expressed	wildtype
TCGA-FG-7638	oligodendroglioma	G3	>30<=50	female	1.87945	0	1.11507	1	Mutant	codel	Methylated	Mutant	Expressed	Mutant
TCGA-FG-7641	oligodendroglioma	G2	>30<=50	male	1.71781	0	1.71781	0	Mutant	codel	Methylated	Mutant	Expressed	wildtype
TCGA-FG-7643	oligoastrocytoma	G2	>30<=50	female	1.67397	0	0.69589	1	wildtype	non-codel	Methylated	Mutant	Not expressed	wildtype
TCGA-FG-8181	oligoastrocytoma	G3	<=30	male	2.36164	0	2.36164	0	wildtype	non-codel	Unmethylated	wildtype	Not expressed	wildtype
TCGA-FG-8182	oligodendroglioma	G2	>30<=50	male	1.13973	0	1.13973	0	Mutant	non-codel	Methylated	wildtype	Not expressed	Mutant
TCGA-FG-8185	astrocytoma	G3	>30<=50	male	1.1863	0	1.1863	0	Mutant	non-codel	Methylated	wildtype	Not expressed	Mutant
TCGA-FG-8186	oligoastrocytoma	G3	>30<=50	female	1.33425	0	1.33425	0	Mutant	codel	Methylated	Mutant	Not expressed	wildtype
TCGA-FG-8187	oligoastrocytoma	G2	>30<=50	male	1.67397	0	1.67397	0	Mutant	codel	Methylated	Mutant	Expressed	wildtype
TCGA-FG-8188	oligoastrocytoma	G2	>30<=50	male	1.24658	0	1.05205	1	Mutant	non-codel	Methylated	wildtype	Not expressed	Mutant
TCGA-FG-8189	oligodendroglioma	G2	>30<=50	female	1.87671	0	1.87671	0	Mutant	non-codel	Methylated	wildtype	Not expressed	wildtype
TCGA-FG-8191	oligodendroglioma	G3	<=30	male	2.71781	0	2.71781	0	Mutant	non-codel	Unmethylated	wildtype	Not expressed	Mutant
TCGA-FG-A4MT	oligodendroglioma	G2	<=30	female	3.18904	0	1.36712	1	Mutant	non-codel	Methylated	wildtype	Not expressed	Mutant
TCGA-FG-A4MU	oligoastrocytoma	G3	>50<=70	male	0.893151	0	0.893151	0	wildtype	non-codel	Methylated	Mutant	Expressed	wildtype
TCGA-FG-A4MW	oligoastrocytoma	G3	>50<=70	male	1.53151	1	0.619178	1	wildtype	non-codel	Methylated	Mutant	Expressed	wildtype
TCGA-FG-A4MX	astrocytoma	G2	>30<=50	male	1.5589	0	1.5589	0	Mutant	non-codel	Methylated	wildtype	Not expressed	Mutant
TCGA-FG-A4MY	oligoastrocytoma	G2	>30<=50	female	1.97534	0	1.97534	0	Mutant	non-codel	Methylated	wildtype	Not expressed	Mutant
TCGA-FG-A60J	oligoastrocytoma	G2	>30<=50	female	1.23014	0	1.23014	0	Mutant	non-codel	Methylated	Mutant	Expressed	wildtype
TCGA-FG-A60K	oligoastrocytoma	G2	>30<=50	female	1.48493	0	1.48493	0	Mutant	codel	Methylated	Mutant	Expressed	wildtype
TCGA-FG-A60L	astrocytoma	G2	>30<=50	female	1.79452	0	1.79452	0	Mutant	non-codel	Methylated	NA	Not expressed	wildtype
TCGA-FG-A6IZ	oligodendroglioma	G2	>50<=70	male	1.25205	0	1.25205	0	Mutant	codel	Methylated	NA	Expressed	wildtype
TCGA-FG-A6J1	oligodendroglioma	G2	>30<=50	female	1.36986	0	1.36986	0	Mutant	codel	Methylated	NA	Expressed	wildtype
TCGA-FG-A6J3	astrocytoma	G3	>50<=70	female	1.85479	0	0.780822	1	Mutant	non-codel	Methylated	NA	Not expressed	wildtype
TCGA-FG-A70Y	oligodendroglioma	G2	<=30	female	2.37808	0	1.34247	1	Mutant	non-codel	Methylated	NA	Not expressed	Mutant
TCGA-FG-A70Z	oligoastrocytoma	G3	>50<=70	female	0.89863	0	0.89863	0	wildtype	non-codel	Methylated	NA	Expressed	wildtype
TCGA-FG-A710	oligodendroglioma	G2	>30<=50	female	3.05479	0	3.05479	0	Mutant	codel	Methylated	NA	Expressed	wildtype
TCGA-FG-A711	oligodendroglioma	G2	>30<=50	female	4.05753	1	0.950685	1	Mutant	non-codel	Unmethylated	NA	Not expressed	Mutant
TCGA-FG-A713	oligoastrocytoma	G2	>70	female	1.70411	0	1.70411	0	Mutant	codel	Methylated	NA	Not expressed	Mutant
TCGA-FG-A87N	astrocytoma	G3	>30<=50	female	1.55342	0	1.55342	0	Mutant	non-codel	Methylated	NA	Not expressed	wildtype
TCGA-FG-A87Q	astrocytoma	G3	>50<=70	female	0.476712	0	0.476712	0	wildtype	non-codel	Methylated	NA	Expressed	wildtype
TCGA-FN-7833	oligoastrocytoma	G3	<=30	male	2.29315	0	2.29315	0	Mutant	non-codel	Methylated	wildtype	Not expressed	Mutant
TCGA-HT-7467	oligodendroglioma	G2	>50<=70	male	0.00821918	0	0.00821918	0	Mutant	codel	Methylated	Mutant	Expressed	wildtype
TCGA-HT-7468	oligodendroglioma	G3	<=30	male	0.556164	0	0.556164	0	Mutant	codel	Methylated	Mutant	Expressed	wildtype
TCGA-HT-7469	oligodendroglioma	G3	<=30	male	0.961644	1	0.252055	1	wildtype	non-codel	Methylated	wildtype	Not expressed	Mutant
TCGA-HT-7470	oligodendroglioma	G3	>30<=50	male	3.34247	1	3.34247	0	Mutant	non-codel	Methylated	wildtype	Not expressed	Mutant
TCGA-HT-7471	oligodendroglioma	G3	>30<=50	female	0.0109589	0	0.0109589	0	Mutant	codel	Methylated	Mutant	Expressed	wildtype
TCGA-HT-7472	oligodendroglioma	G2	>30<=50	male	0.00273973	0	0.00273973	0	Mutant	non-codel	Methylated	wildtype	Not expressed	Mutant
TCGA-HT-7473	oligoastrocytoma	G2	<=30	male	1.37808	0	1.37808	0	Mutant	non-codel	Unmethylated	wildtype	Not expressed	Mutant
TCGA-HT-7474	oligoastrocytoma	G2	>50<=70	male	0.312329	0	0.312329	0	Mutant	non-codel	Methylated	wildtype	Not expressed	Mutant
TCGA-HT-7475	oligoastrocytoma	G3	>50<=70	male	1.45205	0	1.45205	0	Mutant	non-codel	Methylated	wildtype	Not expressed	Mutant
TCGA-HT-7476	astrocytoma	G2	<=30	male	0.545205	0	0.545205	0	Mutant	non-codel	Methylated	wildtype	Not expressed	Mutant
TCGA-HT-7477	astrocytoma	G3	>50<=70	male	2.02192	0	2.02192	0	Mutant	non-codel	Methylated	wildtype	Not expressed	Mutant
TCGA-HT-7478	astrocytoma	G2	>30<=50	male	0.531507	0	0.531507	0	Mutant	non-codel	Unmethylated	wildtype	Not expressed	Mutant
TCGA-HT-7479	astrocytoma	G3	>30<=50	male	3.36164	0	1.93151	1	Mutant	non-codel	Methylated	Mutant	Not expressed	wildtype
TCGA-HT-7480	oligodendroglioma	G2	>30<=50	male	6.26575	0	5.32329	1	Mutant	codel	Methylated	Mutant	Expressed	wildtype
TCGA-HT-7481	oligodendroglioma	G2	>30<=50	male	7.99452	0	2.41096	1	Mutant	codel	Methylated	Mutant	Expressed	wildtype
TCGA-HT-7482	oligoastrocytoma	G2	<=30	female	8.91233	0	1.02466	1	Mutant	non-codel	Methylated	wildtype	Not expressed	Mutant
TCGA-HT-7483	oligoastrocytoma	G2	<=30	male	14.3973	0	14.3973	0	Mutant	non-codel	Unmethylated	wildtype	Not expressed	Mutant
TCGA-HT-7485	astrocytoma	G2	>30<=50	male	0.334247	0	0.334247	0	Mutant	non-codel	Methylated	wildtype	Not expressed	Mutant
TCGA-HT-7601	astrocytoma	G3	<=30	female	0.419178	0	0.419178	0	Mutant	non-codel	Methylated	wildtype	Not expressed	wildtype
TCGA-HT-7602	oligodendroglioma	G2	<=30	male	2.48767	0	2.48767	0	Mutant	non-codel	Methylated	wildtype	Not expressed	wildtype
TCGA-HT-7603	oligodendroglioma	G2	<=30	male	1.93151	0	1.93151	0	Mutant	non-codel	Methylated	wildtype	Not expressed	Mutant
TCGA-HT-7604	astrocytoma	G2	>30<=50	male	10.2055	0	10.2055	0	Mutant	non-codel	Methylated	wildtype	Not expressed	Mutant
TCGA-HT-7605	oligodendroglioma	G2	>30<=50	male	0.380822	0	0.380822	0	Mutant	codel	Methylated	Mutant	Not expressed	wildtype
TCGA-HT-7606	astrocytoma	G2	<=30	female	1.4411	0	1.4411	0	Mutant	non-codel	Unmethylated	wildtype	Not expressed	wildtype
TCGA-HT-7607	astrocytoma	G2	>50<=70	female	0.263014	1	0.263014	1	Mutant	codel	Methylated	Mutant	Expressed	wildtype
TCGA-HT-7608	oligoastrocytoma	G2	>50<=70	male	1.83836	0	1.83836	0	Mutant	codel	Methylated	Mutant	Expressed	wildtype
TCGA-HT-7609	oligoastrocytoma	G3	>30<=50	male	3.83288	0	3.83288	0	Mutant	non-codel	Methylated	wildtype	Not expressed	wildtype
TCGA-HT-7610	oligoastrocytoma	G2	<=30	female	4.67397	0	3.30137	1	Mutant	non-codel	Methylated	wildtype	Not expressed	Mutant
TCGA-HT-7611	oligoastrocytoma	G2	>30<=50	male	4.8	0	4.8	0	Mutant	non-codel	Methylated	wildtype	Not expressed	Mutant
TCGA-HT-7616	oligodendroglioma	G3	>70	male	0.0191781	1	0.0191781	1	Mutant	codel	Methylated	Mutant	Not expressed	wildtype
TCGA-HT-7620	oligodendroglioma	G3	>30<=50	male	1.18904	0	0.767123	1	Mutant	codel	Methylated	Mutant	Expressed	wildtype
TCGA-HT-7676	oligodendroglioma	G2	<=30	male	0.0136986	0	0.0136986	0	Mutant	non-codel	Unmethylated	wildtype	Not expressed	Mutant
TCGA-HT-7677	oligodendroglioma	G3	>50<=70	male	1.35342	0	1.35342	0	Mutant	codel	Methylated	Mutant	Expressed	wildtype
TCGA-HT-7680	astrocytoma	G2	>30<=50	female	0.0630137	0	0.0630137	0	wildtype	non-codel	Unmethylated	wildtype	Not expressed	wildtype
TCGA-HT-7681	oligoastrocytoma	G2	<=30	female	3.72329	0	3.72329	0	Mutant	codel	Methylated	Mutant	Expressed	wildtype
TCGA-HT-7684	oligoastrocytoma	G3	>50<=70	male	0.50411	0	0.50411	0	Mutant	non-codel	Methylated	Mutant	Expressed	wildtype
TCGA-HT-7686	astrocytoma	G3	<=30	female	3.56164	0	3.56164	0	Mutant	non-codel	Methylated	wildtype	Not expressed	Mutant
TCGA-HT-7687	oligodendroglioma	G3	>70	male	0.00821918	0	0.00821918	0	Mutant	codel	Methylated	Mutant	Expressed	wildtype
TCGA-HT-7688	oligodendroglioma	G3	>50<=70	male	2.6411	0	2.6411	0	Mutant	non-codel	Methylated	wildtype	Not expressed	Mutant
TCGA-HT-7689	oligodendroglioma	G2	>50<=70	female	1.24658	0	1.24658	0	Mutant	non-codel	Methylated	wildtype	Not expressed	Mutant
TCGA-HT-7690	oligoastrocytoma	G3	<=30	male	0.00821918	0	0.00821918	0	Mutant	non-codel	Methylated	wildtype	Not expressed	Mutant
TCGA-HT-7691	astrocytoma	G2	>30<=50	female	0.00821918	0	0.00821918	0	wildtype	non-codel	Unmethylated	wildtype	Not expressed	wildtype
TCGA-HT-7692	oligoastrocytoma	G2	>30<=50	male	0.246575	0	0.246575	0	Mutant	codel	Methylated	Mutant	Expressed	wildtype
TCGA-HT-7693	oligodendroglioma	G2	>50<=70	female	1.46027	0	1.46027	0	Mutant	non-codel	Methylated	wildtype	Not expressed	Mutant
TCGA-HT-7694	oligodendroglioma	G3	>50<=70	male	0.575342	0	0.575342	0	Mutant	codel	Methylated	Mutant	Not expressed	wildtype
TCGA-HT-7695	oligodendroglioma	G2	<=30	female	1.21096	0	1.21096	0	Mutant	codel	Methylated	Mutant	Expressed	wildtype
TCGA-HT-7854	astrocytoma	G2	>50<=70	male	3.29041	0	3.14247	1	wildtype	non-codel	Unmethylated	Mutant	Not expressed	wildtype
TCGA-HT-7855	astrocytoma	G3	>30<=50	male	1.60274	0	1.60274	0	Mutant	non-codel	Methylated	wildtype	Not expressed	Mutant
TCGA-HT-7856	oligodendroglioma	G3	>30<=50	male	3.25753	0	3.25753	0	Mutant	codel	Methylated	Mutant	Expressed	wildtype
TCGA-HT-7857	astrocytoma	G3	<=30	female	0.0191781	0	0.0191781	0	wildtype	non-codel	Unmethylated	wildtype	Not expressed	Mutant
TCGA-HT-7858	astrocytoma	G2	<=30	male	4.21918	0	4.21918	0	Mutant	non-codel	Methylated	wildtype	Not expressed	Mutant
TCGA-HT-7860	astrocytoma	G3	>50<=70	female	0.0410959	0	0.0410959	0	wildtype	non-codel	Methylated	Mutant	Expressed	wildtype
TCGA-HT-7873	oligoastrocytoma	G2	<=30	male	1.96712	0	1.96712	0	Mutant	non-codel	Methylated	wildtype	Not expressed	Mutant
TCGA-HT-7874	oligodendroglioma	G3	>30<=50	female	3.09589	0	3.09589	0	Mutant	codel	Methylated	Mutant	Not expressed	wildtype
TCGA-HT-7875	oligodendroglioma	G2	>50<=70	male	0.0273973	0	0.0273973	0	Mutant	codel	Methylated	Mutant	Expressed	wildtype
TCGA-HT-7877	oligodendroglioma	G2	<=30	female	0.0109589	0	0.0109589	0	Mutant	codel	Methylated	Mutant	Expressed	wildtype
TCGA-HT-7879	oligoastrocytoma	G3	>30<=50	male	0.306849	0	0.306849	0	Mutant	non-codel	Methylated	wildtype	Not expressed	Mutant
TCGA-HT-7880	oligoastrocytoma	G2	<=30	male	0.443836	0	0.443836	0	Mutant	non-codel	Methylated	wildtype	Not expressed	Mutant
TCGA-HT-7881	oligodendroglioma	G2	>30<=50	male	2.95616	0	2.95616	0	Mutant	codel	Methylated	Mutant	Expressed	wildtype
TCGA-HT-7882	oligodendroglioma	G3	>50<=70	male	0.309589	1	0.309589	1	wildtype	non-codel	Methylated	Mutant	Expressed	wildtype
TCGA-HT-7884	astrocytoma	G2	>30<=50	female	0.939726	0	0.939726	0	Mutant	non-codel	Methylated	wildtype	Not expressed	Mutant
TCGA-HT-7902	oligoastrocytoma	G2	<=30	female	2.61918	0	2.61918	0	Mutant	non-codel	Methylated	wildtype	Not expressed	Mutant
TCGA-HT-8010	oligodendroglioma	G2	>50<=70	female	0.136986	0	0.136986	0	Mutant	codel	Methylated	wildtype	Not expressed	wildtype
TCGA-HT-8011	astrocytoma	G3	>50<=70	male	1.35342	0	0.761644	1	wildtype	non-codel	Unmethylated	Mutant	Expressed	wildtype
TCGA-HT-8012	oligodendroglioma	G2	<=30	female	0.783562	0	0.364384	1	Mutant	codel	Methylated	Mutant	Expressed	wildtype
TCGA-HT-8013	oligoastrocytoma	G2	>30<=50	female	5.29589	1	3.57808	1	Mutant	non-codel	Methylated	wildtype	Not expressed	Mutant
TCGA-HT-8015	astrocytoma	G2	<=30	male	0.00821918	0	0.00821918	0	wildtype	non-codel	Unmethylated	wildtype	Not expressed	wildtype
TCGA-HT-8018	oligoastrocytoma	G2	>30<=50	female	3.15616	1	3.15616	0	Mutant	non-codel	Methylated	wildtype	Not expressed	wildtype
TCGA-HT-8019	oligodendroglioma	G3	>30<=50	female	2.75068	0	2.75068	0	wildtype	non-codel	Unmethylated	wildtype	Not expressed	wildtype
TCGA-HT-8104	astrocytoma	G3	>50<=70	female	1.01918	0	1.01918	0	wildtype	non-codel	Unmethylated	Mutant	Expressed	wildtype
TCGA-HT-8105	oligodendroglioma	G3	>50<=70	male	0.520548	0	0.520548	0	Mutant	codel	Methylated	Mutant	Expressed	wildtype
TCGA-HT-8107	oligodendroglioma	G2	>50<=70	male	0.0383562	0	0.0383562	0	wildtype	non-codel	Methylated	wildtype	Not expressed	wildtype
TCGA-HT-8108	oligodendroglioma	G2	<=30	female	0.208219	0	0.208219	0	Mutant	non-codel	Methylated	wildtype	Not expressed	Mutant
TCGA-HT-8109	oligodendroglioma	G3	>50<=70	male	0.463014	0	0.463014	0	Mutant	codel	Methylated	Mutant	Expressed	wildtype
TCGA-HT-8110	astrocytoma	G3	>50<=70	male	1.14795	0	1.14795	0	wildtype	non-codel	Methylated	Mutant	Expressed	wildtype
TCGA-HT-8111	oligoastrocytoma	G3	>30<=50	male	0.0191781	0	0.0191781	0	Mutant	non-codel	Methylated	wildtype	Not expressed	wildtype
TCGA-HT-8113	oligodendroglioma	G2	>30<=50	female	2.46575	0	2.46575	0	Mutant	non-codel	Methylated	Mutant	Expressed	wildtype
TCGA-HT-8114	oligoastrocytoma	G3	>30<=50	male	2.84932	0	2.84932	0	Mutant	non-codel	Methylated	wildtype	Not expressed	Mutant
TCGA-HT-8558	oligodendroglioma	G2	<=30	female	1.14521	0	1.14521	0	wildtype	non-codel	Unmethylated	wildtype	Expressed	wildtype
TCGA-HT-8563	astrocytoma	G3	<=30	female	2.35616	0	2.35616	0	Mutant	non-codel	Unmethylated	wildtype	Not expressed	Mutant
TCGA-HT-8564	astrocytoma	G3	>30<=50	male	1.30959	0	0.328767	1	wildtype	non-codel	Unmethylated	wildtype	Not expressed	wildtype
TCGA-HT-A4DS	astrocytoma	G3	>50<=70	female	0.0191781	0	0.0191781	0	wildtype	non-codel	Unmethylated	Mutant	Expressed	wildtype
TCGA-HT-A4DV	oligodendroglioma	G3	>50<=70	female	2.16986	0	2.16986	0	Mutant	codel	Methylated	Mutant	Not expressed	wildtype
TCGA-HT-A5R5	oligodendroglioma	G2	>30<=50	female	0.0109589	0	0.0109589	0	Mutant	non-codel	Methylated	wildtype	Not expressed	Mutant
TCGA-HT-A5R7	astrocytoma	G3	>30<=50	female	1.68493	0	1.68493	0	Mutant	non-codel	Methylated	wildtype	Not expressed	Mutant
TCGA-HT-A5R9	oligodendroglioma	G3	>30<=50	female	0.00547945	0	0.00547945	0	Mutant	codel	Methylated	Mutant	Expressed	wildtype
TCGA-HT-A5RA	astrocytoma	G3	>50<=70	female	2.27945	0	2.27945	0	wildtype	non-codel	Unmethylated	Mutant	Expressed	wildtype
TCGA-HT-A5RB	astrocytoma	G2	<=30	male	0.00821918	0	0.00821918	0	Mutant	non-codel	Methylated	wildtype	Not expressed	Mutant
TCGA-HT-A5RC	astrocytoma	G3	>50<=70	female	0.443836	1	0.443836	1	wildtype	non-codel	Unmethylated	wildtype	Expressed	wildtype
TCGA-HT-A614	oligoastrocytoma	G2	>30<=50	male	0.224658	0	0.224658	0	Mutant	non-codel	Methylated	wildtype	Not expressed	Mutant
TCGA-HT-A615	oligodendroglioma	G2	>30<=50	female	1.41096	0	1.41096	0	Mutant	codel	Methylated	Mutant	Expressed	wildtype
TCGA-HT-A616	astrocytoma	G2	>30<=50	female	0.150685	0	0.150685	0	Mutant	non-codel	Methylated	wildtype	Not expressed	Mutant
TCGA-HT-A617	oligodendroglioma	G2	>30<=50	male	1.34521	0	1.08219	1	wildtype	non-codel	Unmethylated	Mutant	Not expressed	wildtype
TCGA-HT-A618	astrocytoma	G3	>30<=50	female	1.40274	0	1.40274	0	Mutant	non-codel	Methylated	wildtype	Not expressed	Mutant
TCGA-HT-A619	oligodendroglioma	G3	>50<=70	female	1.78356	0	1.78356	0	Mutant	codel	Methylated	Mutant	Expressed	wildtype
TCGA-HT-A61A	oligodendroglioma	G2	<=30	female	0.531507	0	0.531507	0	Mutant	non-codel	Methylated	Mutant	NA	wildtype
TCGA-HT-A61B	NA	G3	<=30	NA	1.46027	0	1.46027	0	Mutant	non-codel	Methylated	wildtype	Expressed	wildtype
TCGA-HT-A61C	oligodendroglioma	G3	>50<=70	male	1.47123	1	1.30411	1	wildtype	non-codel	Unmethylated	Mutant	Expressed	wildtype
TCGA-HT-A74H	astrocytoma	G3	>50<=70	male	0.20274	0	0.20274	0	wildtype	non-codel	Unmethylated	NA	Not expressed	wildtype
TCGA-HT-A74J	oligoastrocytoma	G2	>30<=50	male	0.876712	0	0.876712	0	Mutant	non-codel	Unmethylated	NA	Expressed	Mutant
TCGA-HT-A74K	NA	G3	>50<=70	NA	1.27945	0	1.27945	0	Mutant	codel	Methylated	NA	Expressed	wildtype
TCGA-HT-A74L	NA	G2	<=30	NA	0.920548	0	0.920548	0	Mutant	codel	Methylated	NA	Expressed	wildtype
TCGA-HT-A74O	astrocytoma	G3	>30<=50	male	0.00821918	0	0.00821918	0	Mutant	non-codel	Methylated	NA	Not expressed	Mutant
TCGA-HW-7486	oligodendroglioma	G2	>30<=50	male	4.71507	0	4.71507	0	Mutant	codel	Methylated	Mutant	Expressed	wildtype
TCGA-HW-7487	oligodendroglioma	G2	>30<=50	male	3.7863	0	2.30137	1	Mutant	codel	Methylated	Mutant	Expressed	wildtype
TCGA-HW-7489	oligoastrocytoma	G2	>30<=50	male	3.45753	1	3.45753	1	Mutant	non-codel	Methylated	wildtype	Not expressed	Mutant
TCGA-HW-7490	astrocytoma	G2	>30<=50	male	3.8	0	3.8	0	Mutant	non-codel	Methylated	wildtype	Not expressed	Mutant
TCGA-HW-7491	oligodendroglioma	G2	>30<=50	male	5.69315	0	6.01918	1	Mutant	codel	Unmethylated	Mutant	Expressed	wildtype
TCGA-HW-7493	astrocytoma	G2	>30<=50	female	5.7726	0	5.7726	0	NA	non-codel	Methylated	NA	Not expressed	NA
TCGA-HW-7495	oligodendroglioma	G2	>30<=50	female	2.95342	0	2.95342	0	Mutant	codel	Methylated	Mutant	Expressed	wildtype
TCGA-HW-8319	astrocytoma	G3	>30<=50	female	3.31233	1	2.73151	1	Mutant	non-codel	Unmethylated	wildtype	Not expressed	Mutant
TCGA-HW-8320	astrocytoma	G3	>30<=50	male	3.33425	0	3.33425	0	Mutant	non-codel	Methylated	wildtype	Not expressed	wildtype
TCGA-HW-8321	astrocytoma	G3	>30<=50	male	3.54521	0	3.54521	0	Mutant	non-codel	Methylated	wildtype	Not expressed	wildtype
TCGA-HW-8322	oligodendroglioma	G2	>30<=50	male	2.07671	0	2.07671	0	Mutant	codel	Methylated	Mutant	Expressed	wildtype
TCGA-HW-A5KJ	oligodendroglioma	G3	>50<=70	male	2.63562	1	1.68493	1	Mutant	codel	Methylated	Mutant	Expressed	wildtype
TCGA-HW-A5KK	astrocytoma	G3	>50<=70	male	1.06301	1	1.06301	1	wildtype	non-codel	Methylated	Mutant	Expressed	wildtype
TCGA-HW-A5KL	astrocytoma	G2	>30<=50	female	2.40548	0	2.40548	0	Mutant	non-codel	Methylated	wildtype	Not expressed	Mutant
TCGA-HW-A5KM	astrocytoma	G2	>30<=50	male	1.72603	0	1.72603	0	Mutant	non-codel	Methylated	wildtype	Not expressed	wildtype
TCGA-IK-7675	oligodendroglioma	G2	>30<=50	male	1.58356	1	0.336986	1	Mutant	non-codel	Methylated	wildtype	Not expressed	Mutant
TCGA-IK-8125	oligoastrocytoma	G3	>50<=70	male	3.56438	0	3.56438	0	Mutant	codel	Methylated	Mutant	Expressed	wildtype
TCGA-KT-A74X	oligoastrocytoma	G3	<=30	male	1.2	0	1.2	0	Mutant	codel	Methylated	NA	Expressed	wildtype
TCGA-KT-A7W1	astrocytoma	G3	>30<=50	female	1.2	0	0.230137	1	wildtype	non-codel	Methylated	NA	Expressed	wildtype
TCGA-P5-A5ET	oligodendroglioma	G2	<=30	male	0	0	0	0	Mutant	codel	Methylated	Mutant	Expressed	wildtype
TCGA-P5-A5EU	astrocytoma	G3	>30<=50	male	0	0	0	0	Mutant	non-codel	Unmethylated	wildtype	Not expressed	Mutant
TCGA-P5-A5EV	astrocytoma	G2	>30<=50	male	0.0191781	0	0.0191781	0	Mutant	non-codel	Methylated	wildtype	Not expressed	Mutant
TCGA-P5-A5EW	astrocytoma	G2	<=30	female	0.558904	0	0.558904	0	Mutant	non-codel	Methylated	wildtype	Not expressed	Mutant
TCGA-P5-A5EX	oligodendroglioma	G3	>30<=50	female	0.665753	0	0.665753	0	Mutant	codel	Methylated	Mutant	Expressed	wildtype
TCGA-P5-A5EY	astrocytoma	G2	<=30	male	0.19726	0	0.19726	0	wildtype	non-codel	Unmethylated	wildtype	Not expressed	wildtype
TCGA-P5-A5EZ	astrocytoma	G3	>30<=50	male	0.191781	0	0.191781	0	Mutant	non-codel	Methylated	wildtype	Not expressed	wildtype
TCGA-P5-A5F0	oligodendroglioma	G2	>30<=50	male	0.786301	0	0.786301	0	Mutant	codel	Methylated	Mutant	Expressed	wildtype
TCGA-P5-A5F1	astrocytoma	G2	<=30	male	0.490411	0	0.490411	0	Mutant	non-codel	Unmethylated	wildtype	Not expressed	Mutant
TCGA-P5-A5F2	astrocytoma	G2	>30<=50	female	0.663014	0	0.663014	0	Mutant	non-codel	Methylated	wildtype	Not expressed	Mutant
TCGA-P5-A5F4	oligodendroglioma	G3	>30<=50	female	0.632877	0	0.632877	0	Mutant	non-codel	Methylated	wildtype	Not expressed	wildtype
TCGA-P5-A5F6	oligodendroglioma	G2	<=30	male	0.106849	0	0.106849	0	wildtype	non-codel	Unmethylated	wildtype	Not expressed	wildtype
TCGA-P5-A72U	oligodendroglioma	G3	>70	female	0.0191781	0	0.0191781	0	wildtype	non-codel	Methylated	NA	Not expressed	wildtype
TCGA-P5-A72W	astrocytoma	G3	>30<=50	male	0.868493	0	0.868493	0	Mutant	non-codel	Unmethylated	NA	Not expressed	Mutant
TCGA-P5-A72X	astrocytoma	G3	<=30	male	1.10411	0	1.10411	0	Mutant	non-codel	Methylated	NA	Not expressed	wildtype
TCGA-P5-A72Z	oligodendroglioma	G3	>50<=70	female	0.969863	0	0.969863	0	Mutant	codel	Methylated	NA	Expressed	wildtype
TCGA-P5-A730	oligoastrocytoma	G3	<=30	male	0.912329	0	0.912329	0	Mutant	codel	Methylated	NA	Expressed	wildtype
TCGA-P5-A731	oligoastrocytoma	G2	>50<=70	female	0.750685	0	0.750685	0	Mutant	non-codel	Methylated	NA	Expressed	wildtype
TCGA-P5-A733	astrocytoma	G2	>50<=70	female	1.13425	0	1.13425	0	Mutant	non-codel	Methylated	NA	Not expressed	Mutant
TCGA-P5-A735	NA	G2	>30<=50	NA	0.8	0	0.8	0	Mutant	non-codel	Methylated	NA	Not expressed	Mutant
TCGA-P5-A736	NA	G3	>30<=50	NA	0.630137	0	0.630137	0	Mutant	non-codel	Methylated	NA	Not expressed	Mutant
TCGA-P5-A737	NA	G2	>30<=50	NA	1.01918	0	1.01918	0	Mutant	codel	Methylated	NA	Expressed	wildtype
TCGA-P5-A77W	NA	G3	>30<=50	NA	1.6	0	1.6	0	Mutant	codel	Methylated	NA	Expressed	wildtype
TCGA-P5-A77X	NA	G2	>50<=70	NA	0.287671	0	0.287671	0	Mutant	codel	Methylated	NA	Not expressed	wildtype
TCGA-P5-A780	NA	G3	>30<=50	NA	0.19726	0	0.19726	0	Mutant	non-codel	Methylated	NA	Not expressed	wildtype
TCGA-P5-A781	NA	G3	>30<=50	NA	0.367123	0	0.367123	0	Mutant	codel	Methylated	NA	Expressed	wildtype
TCGA-QH-A65R	oligodendroglioma	G3	>30<=50	female	1.26301	0	1.26301	0	Mutant	codel	Methylated	NA	Expressed	wildtype
TCGA-QH-A65S	oligoastrocytoma	G2	>30<=50	female	0.210959	0	0.210959	0	Mutant	non-codel	Methylated	wildtype	Not expressed	Mutant
TCGA-QH-A65V	oligodendroglioma	G2	>30<=50	female	1.05205	0	1.05205	0	Mutant	codel	Methylated	Mutant	Expressed	wildtype
TCGA-QH-A65X	oligoastrocytoma	G3	<=30	female	1.32055	0	1.32055	0	Mutant	codel	Methylated	NA	Expressed	wildtype
TCGA-QH-A65Z	oligodendroglioma	G2	>50<=70	male	1.16986	0	1.16986	0	Mutant	codel	Methylated	Mutant	Expressed	wildtype
TCGA-QH-A6CS	astrocytoma	G3	>30<=50	male	1.61096	0	1.36438	1	wildtype	non-codel	Unmethylated	NA	NA	wildtype
TCGA-QH-A6CU	oligodendroglioma	G3	>50<=70	female	1.23562	0	1.23562	0	Mutant	codel	Methylated	NA	Expressed	wildtype
TCGA-QH-A6CV	oligoastrocytoma	G3	>50<=70	male	1.21096	0	1.21096	0	wildtype	non-codel	Unmethylated	NA	Expressed	wildtype
TCGA-QH-A6CW	oligoastrocytoma	G3	>30<=50	male	1.13425	0	1.13425	0	Mutant	non-codel	Methylated	NA	Not expressed	Mutant
TCGA-QH-A6CX	astrocytoma	G2	>50<=70	male	1.01918	1	0.747945	1	wildtype	non-codel	Unmethylated	NA	Expressed	wildtype
TCGA-QH-A6CY	oligoastrocytoma	G3	>30<=50	male	1.11781	0	1.11781	0	Mutant	codel	Methylated	NA	Expressed	wildtype
TCGA-QH-A6CZ	oligoastrocytoma	G2	>30<=50	male	0.764384	0	0.764384	0	Mutant	codel	Methylated	NA	Expressed	wildtype
TCGA-QH-A6X3	oligoastrocytoma	G2	<=30	male	0.857534	0	0.857534	0	Mutant	non-codel	Methylated	NA	Not expressed	Mutant
TCGA-QH-A6X4	oligoastrocytoma	G3	>30<=50	male	1.21096	0	1.21096	0	Mutant	codel	Methylated	NA	Expressed	wildtype
TCGA-QH-A6X5	oligoastrocytoma	G2	>50<=70	female	1.36164	0	1.36164	0	Mutant	codel	Methylated	NA	Expressed	wildtype
TCGA-QH-A6X8	oligodendroglioma	G3	>50<=70	female	1.39452	0	1.39452	0	Mutant	codel	Methylated	NA	Expressed	wildtype
TCGA-QH-A6X9	oligodendroglioma	G2	>70	female	0.158904	0	0.158904	0	Mutant	non-codel	Methylated	NA	Not expressed	Mutant
TCGA-QH-A6XA	oligoastrocytoma	G2	<=30	female	1.37534	0	1.37534	0	Mutant	non-codel	Methylated	NA	Not expressed	Mutant
TCGA-QH-A6XC	astrocytoma	G3	>30<=50	male	1.39178	0	1.2	1	wildtype	non-codel	Methylated	NA	Expressed	wildtype
TCGA-QH-A86X	oligodendroglioma	G2	>30<=50	male	0.923288	0	0.923288	0	Mutant	codel	Methylated	NA	Expressed	wildtype
TCGA-QH-A870	oligoastrocytoma	G3	>30<=50	female	1.08219	0	0.917808	1	Mutant	non-codel	Methylated	NA	Not expressed	Mutant
TCGA-R8-A6MK	oligodendroglioma	G2	>30<=50	male	7.40274	0	7.40274	0	Mutant	codel	Methylated	NA	Expressed	wildtype
TCGA-R8-A6ML	oligodendroglioma	G3	>50<=70	male	7.83562	0	7.83562	0	Mutant	codel	Methylated	NA	Expressed	wildtype
TCGA-R8-A6MO	oligodendroglioma	G2	>50<=70	female	2.72055	0	2.72055	0	Mutant	codel	Methylated	NA	Expressed	wildtype
TCGA-R8-A73M	oligodendroglioma	G2	>30<=50	female	4.94795	0	4.94795	0	Mutant	codel	Methylated	NA	Expressed	wildtype
TCGA-RY-A83X	NA	G2	>30<=50	NA	2.5726	0	2.5726	0	Mutant	codel	Methylated	NA	Expressed	wildtype
TCGA-RY-A83Y	NA	G2	>30<=50	NA	0.454795	0	0.454795	0	Mutant	codel	Methylated	NA	Expressed	wildtype
TCGA-RY-A83Z	NA	G3	>50<=70	NA	0.824658	0	0.824658	0	Mutant	non-codel	Methylated	NA	Not expressed	Mutant
TCGA-RY-A840	NA	G3	>30<=50	NA	2.33973	0	2.33973	0	Mutant	codel	Methylated	NA	Expressed	wildtype
TCGA-RY-A843	NA	G3	<=30	NA	0.172603	0	0.172603	0	Mutant	non-codel	Methylated	NA	Expressed	wildtype
TCGA-RY-A845	NA	G2	>30<=50	NA	1.63288	0	1.63288	0	Mutant	non-codel	Methylated	NA	Not expressed	wildtype
TCGA-RY-A847	NA	G2	>30<=50	NA	2.55616	0	2.55616	0	Mutant	codel	Methylated	NA	Expressed	wildtype
TCGA-S9-A6TS	astrocytoma	G3	>30<=50	female	5.18082	1	3.6274	1	Mutant	non-codel	Methylated	NA	Not expressed	Mutant
TCGA-S9-A6TU	astrocytoma	G2	>30<=50	male	7.26027	0	4.0411	1	Mutant	non-codel	Methylated	NA	Not expressed	wildtype
TCGA-S9-A6TV	oligoastrocytoma	G3	>30<=50	male	1.56438	0	1.56438	0	Mutant	non-codel	Methylated	NA	Not expressed	Mutant
TCGA-S9-A6TW	oligodendroglioma	G3	>30<=50	male	3.42466	0	2.3589	1	Mutant	codel	Methylated	NA	Expressed	wildtype
TCGA-S9-A6TX	oligodendroglioma	G3	>30<=50	male	3.41096	0	2.34521	1	Mutant	codel	Methylated	NA	Expressed	wildtype
TCGA-S9-A6TY	oligodendroglioma	G2	>30<=50	male	2.94795	0	2.94795	0	Mutant	codel	Methylated	NA	Expressed	wildtype
TCGA-S9-A6TZ	astrocytoma	G2	>30<=50	female	3.06849	0	1.51233	1	Mutant	non-codel	Methylated	NA	Expressed	wildtype
TCGA-S9-A6U0	astrocytoma	G3	>30<=50	male	2.03288	1	1.89589	1	wildtype	non-codel	Methylated	NA	Expressed	wildtype
TCGA-S9-A6U1	astrocytoma	G3	<=30	female	2.15068	0	2.15068	0	Mutant	non-codel	Methylated	NA	Not expressed	Mutant
TCGA-S9-A6U2	oligodendroglioma	G2	>30<=50	female	2.48767	0	2.48767	0	Mutant	codel	Methylated	NA	Expressed	wildtype
TCGA-S9-A6U5	astrocytoma	G2	>30<=50	male	2.71781	0	2.71781	0	Mutant	codel	Methylated	NA	Expressed	wildtype
TCGA-S9-A6U6	astrocytoma	G3	<=30	male	2.92877	0	2.92877	0	Mutant	non-codel	Methylated	NA	Not expressed	Mutant
TCGA-S9-A6U8	astrocytoma	G2	<=30	male	8.1863	1	1.00548	1	Mutant	non-codel	Methylated	NA	Not expressed	Mutant
TCGA-S9-A6U9	astrocytoma	G3	>30<=50	male	7.99452	0	7.99452	0	Mutant	non-codel	Methylated	NA	Not expressed	Mutant
TCGA-S9-A6UA	astrocytoma	G3	>50<=70	male	0.487671	1	0.441096	1	wildtype	non-codel	Methylated	NA	Not expressed	Mutant
TCGA-S9-A6UB	oligodendroglioma	G2	>50<=70	male	10.3041	0	10.3041	0	Mutant	codel	Methylated	NA	Expressed	wildtype
TCGA-S9-A6WD	oligodendroglioma	G3	>50<=70	male	6.27123	0	6.27123	0	Mutant	codel	Methylated	NA	Expressed	wildtype
TCGA-S9-A6WE	oligodendroglioma	G2	>30<=50	male	11.2685	0	11.2685	0	Mutant	codel	Methylated	NA	Expressed	wildtype
TCGA-S9-A6WG	astrocytoma	G3	>30<=50	male	7.12877	0	7.12877	0	Mutant	non-codel	Methylated	NA	Not expressed	Mutant
TCGA-S9-A6WH	oligoastrocytoma	G2	>70	female	3.2137	0	3.2137	0	Mutant	codel	Methylated	NA	Expressed	wildtype
TCGA-S9-A6WI	oligoastrocytoma	G2	>50<=70	female	7.08219	0	7.08219	0	Mutant	non-codel	Methylated	NA	Not expressed	wildtype
TCGA-S9-A6WL	astrocytoma	G3	>50<=70	male	2.59178	0	0.657534	1	Mutant	codel	Methylated	NA	Expressed	wildtype
TCGA-S9-A6WM	astrocytoma	G3	>50<=70	female	1.65479	0	1.38356	1	wildtype	non-codel	Unmethylated	NA	Expressed	wildtype
TCGA-S9-A6WN	astrocytoma	G3	>30<=50	female	2.20548	0	0.830137	1	Mutant	codel	Methylated	NA	Expressed	wildtype
TCGA-S9-A6WO	astrocytoma	G2	<=30	male	1.55068	0	0.512329	1	Mutant	non-codel	Methylated	NA	Not expressed	Mutant
TCGA-S9-A6WP	oligoastrocytoma	G3	>30<=50	male	1.55342	0	1.55342	0	Mutant	codel	Methylated	NA	Not expressed	wildtype
TCGA-S9-A6WQ	oligoastrocytoma	G2	>50<=70	female	1.1726	0	1.1726	0	Mutant	non-codel	Methylated	NA	Not expressed	Mutant
TCGA-S9-A7IQ	oligoastrocytoma	G2	>30<=50	female	3.01096	0	3.01096	0	Mutant	codel	Methylated	NA	Expressed	wildtype
TCGA-S9-A7IS	astrocytoma	G3	>30<=50	female	0.660274	1	0.660274	1	Mutant	non-codel	Methylated	NA	Expressed	Mutant
TCGA-S9-A7IX	astrocytoma	G3	>50<=70	male	2.24384	1	0.958904	1	wildtype	non-codel	Unmethylated	NA	Not expressed	wildtype
TCGA-S9-A7IY	oligoastrocytoma	G3	>30<=50	male	1.9589	0	1.9589	0	Mutant	codel	Methylated	NA	Expressed	wildtype
TCGA-S9-A7IZ	astrocytoma	G3	>30<=50	female	1.66575	0	1.27945	1	Mutant	non-codel	Methylated	NA	Not expressed	Mutant
TCGA-S9-A7J0	oligodendroglioma	G3	<=30	female	1.66849	0	1.06849	1	Mutant	non-codel	Methylated	NA	Not expressed	wildtype
TCGA-S9-A7J1	oligodendroglioma	G2	>30<=50	male	0.682192	0	0.682192	0	Mutant	codel	Methylated	NA	Expressed	wildtype
TCGA-S9-A7J2	oligodendroglioma	G3	<=30	male	0.169863	0	0.169863	0	Mutant	codel	Methylated	NA	Expressed	wildtype
TCGA-S9-A7J3	oligodendroglioma	G3	>50<=70	female	1.72329	0	1.72329	0	Mutant	codel	Methylated	NA	Expressed	wildtype
TCGA-S9-A7QW	astrocytoma	G3	>50<=70	female	1.25479	0	1.04658	1	Mutant	non-codel	Methylated	NA	Not expressed	Mutant
TCGA-S9-A7QX	astrocytoma	G3	>30<=50	female	1.54521	0	1.54521	0	Mutant	non-codel	Methylated	NA	Not expressed	Mutant
TCGA-S9-A7QY	oligoastrocytoma	G2	>30<=50	female	2.36438	0	2.36438	0	Mutant	codel	Methylated	NA	Expressed	wildtype
TCGA-S9-A7QZ	oligodendroglioma	G2	>30<=50	male	2.26301	0	2.12055	1	Mutant	codel	Methylated	NA	Expressed	wildtype
TCGA-S9-A7R1	oligodendroglioma	G2	>30<=50	male	14.1534	1	9.96438	1	Mutant	codel	Methylated	NA	Expressed	wildtype
TCGA-S9-A7R2	astrocytoma	G3	>50<=70	male	0.865753	1	0.865753	1	wildtype	non-codel	Unmethylated	NA	Expressed	wildtype
TCGA-S9-A7R3	astrocytoma	G2	<=30	female	8.25479	0	2.65753	1	Mutant	non-codel	Methylated	NA	Not expressed	wildtype
TCGA-S9-A7R4	astrocytoma	G3	>30<=50	male	2.50411	0	2.50411	0	Mutant	non-codel	Methylated	NA	Not expressed	wildtype
TCGA-S9-A7R7	astrocytoma	G2	<=30	male	8.21918	0	0.394521	1	Mutant	non-codel	Methylated	NA	Not expressed	Mutant
TCGA-S9-A7R8	astrocytoma	G3	>30<=50	female	2.63288	1	1.91233	1	Mutant	non-codel	Methylated	NA	Not expressed	Mutant
TCGA-S9-A89V	astrocytoma	G3	>50<=70	male	1.5589	0	0.353425	1	wildtype	non-codel	Methylated	NA	Not expressed	Mutant
TCGA-S9-A89Z	astrocytoma	G3	>30<=50	male	1.70685	0	1.70685	0	Mutant	non-codel	Methylated	NA	Not expressed	wildtype
TCGA-TM-A7C3	astrocytoma	G3	>30<=50	female	4.56438	1	1.95342	1	wildtype	non-codel	Methylated	NA	Expressed	wildtype
TCGA-TM-A7C4	astrocytoma	G2	>30<=50	female	4.0274	0	4.0274	0	Mutant	non-codel	Methylated	NA	Not expressed	Mutant
TCGA-TM-A7C5	oligoastrocytoma	G2	<=30	male	4.10959	0	4.10959	0	Mutant	codel	Methylated	NA	Expressed	wildtype
TCGA-TM-A7CA	astrocytoma	G2	>30<=50	male	2.89863	0	2.89863	0	Mutant	non-codel	Methylated	NA	Not expressed	Mutant
TCGA-TM-A7CF	astrocytoma	G2	>30<=50	female	5.44932	0	2.53151	1	Mutant	non-codel	Methylated	wildtype	Not expressed	wildtype
TCGA-TM-A84B	astrocytoma	G3	>30<=50	male	2.07671	1	2.07671	1	wildtype	non-codel	Unmethylated	NA	Expressed	wildtype
TCGA-TM-A84C	astrocytoma	G2	>30<=50	male	1.34795	1	1.34795	1	wildtype	non-codel	Unmethylated	NA	Not expressed	wildtype
TCGA-TM-A84F	astrocytoma	G3	>30<=50	male	4.92055	0	4.92055	0	Mutant	non-codel	Methylated	NA	Expressed	wildtype
TCGA-TM-A84G	oligodendroglioma	G3	>50<=70	female	3.3863	0	3.3863	0	Mutant	codel	Methylated	NA	Expressed	wildtype
TCGA-TM-A84H	oligoastrocytoma	G3	>30<=50	female	2.53699	0	2.53699	0	Mutant	non-codel	Methylated	NA	Not expressed	Mutant
TCGA-TM-A84I	astrocytoma	G3	<=30	male	2.33973	0	2.33973	0	Mutant	non-codel	Methylated	NA	Not expressed	Mutant
TCGA-TM-A84J	oligodendroglioma	G3	>50<=70	male	2.0137	0	1.24384	1	wildtype	non-codel	Unmethylated	NA	Expressed	wildtype
TCGA-TM-A84L	oligoastrocytoma	G2	>30<=50	male	3.40274	1	2.70411	1	Mutant	non-codel	Methylated	NA	Not expressed	Mutant
TCGA-TM-A84M	oligodendroglioma	G3	>30<=50	male	2.06575	0	2.06575	0	Mutant	codel	Methylated	NA	Expressed	wildtype
TCGA-TM-A84O	oligodendroglioma	G3	>50<=70	female	2.76986	1	2.76986	1	Mutant	codel	Methylated	NA	Not expressed	wildtype
TCGA-TM-A84Q	astrocytoma	G2	>30<=50	male	2.11507	0	1.24658	1	Mutant	non-codel	Methylated	NA	Not expressed	Mutant
TCGA-TM-A84R	oligodendroglioma	G2	>30<=50	male	1.55068	0	1.55068	0	Mutant	codel	Methylated	NA	Not expressed	wildtype
TCGA-TM-A84S	oligodendroglioma	G3	>30<=50	male	1.24384	0	1.24384	0	Mutant	codel	Methylated	NA	Expressed	wildtype
TCGA-TM-A84T	oligoastrocytoma	G2	<=30	male	1.98356	0	1.98356	0	Mutant	non-codel	Methylated	NA	Not expressed	Mutant
TCGA-TQ-A7RF	NA	G3	<=30	NA	1.78082	0	1.78082	0	Mutant	non-codel	Unmethylated	NA	Not expressed	wildtype
TCGA-TQ-A7RG	NA	G2	>30<=50	NA	1.6411	0	1.6411	0	Mutant	codel	Methylated	NA	Expressed	wildtype
TCGA-TQ-A7RH	NA	G2	>30<=50	NA	1.33151	0	1.33151	0	Mutant	non-codel	Methylated	NA	Not expressed	Mutant
TCGA-TQ-A7RI	NA	G2	>30<=50	NA	0.169863	0	0.169863	0	Mutant	codel	Methylated	NA	Expressed	wildtype
TCGA-TQ-A7RJ	NA	G2	<=30	NA	3.36712	0	3.36712	0	Mutant	non-codel	Methylated	NA	Not expressed	Mutant
TCGA-TQ-A7RK	NA	G2	<=30	NA	3.67397	0	2.35068	1	Mutant	non-codel	Methylated	wildtype	Not expressed	Mutant
TCGA-TQ-A7RM	NA	G3	>30<=50	NA	3.05753	0	3.05753	0	Mutant	non-codel	Methylated	NA	Not expressed	wildtype
TCGA-TQ-A7RN	NA	G2	>30<=50	NA	2.81096	0	2.81096	0	Mutant	codel	Methylated	NA	Expressed	wildtype
TCGA-TQ-A7RO	NA	G2	<=30	NA	2.6	0	2.6	0	Mutant	codel	Methylated	NA	Expressed	wildtype
TCGA-TQ-A7RP	NA	G2	>50<=70	NA	2.50411	0	2.50411	0	wildtype	non-codel	Methylated	NA	Not expressed	wildtype
TCGA-TQ-A7RQ	NA	G2	>30<=50	NA	2.17808	0	2.17808	0	Mutant	codel	Methylated	NA	Expressed	wildtype
TCGA-TQ-A7RR	NA	G2	>30<=50	NA	2.15616	0	2.15616	0	Mutant	non-codel	Unmethylated	NA	Not expressed	Mutant
TCGA-TQ-A7RS	NA	G2	<=30	NA	0	0	0	0	Mutant	codel	Methylated	NA	Expressed	wildtype
TCGA-TQ-A7RV	NA	G2	<=30	NA	5.11781	0	1.45205	1	Mutant	non-codel	Methylated	wildtype	Not expressed	Mutant
TCGA-TQ-A7RW	NA	G2	>30<=50	NA	2.24932	1	1.4	1	Mutant	non-codel	Methylated	NA	Not expressed	wildtype
TCGA-TQ-A8XE	NA	G2	>30<=50	NA	2.6137	1	1.24658	1	Mutant	non-codel	Methylated	wildtype	Not expressed	wildtype
TCGA-VM-A8C8	oligodendroglioma	G2	>30<=50	female	3.8274	0	1.24932	1	Mutant	non-codel	Unmethylated	NA	Not expressed	Mutant
TCGA-VM-A8C9	astrocytoma	G2	>30<=50	female	3.6	0	3.6	0	wildtype	non-codel	Unmethylated	NA	Not expressed	wildtype
TCGA-VM-A8CA	oligodendroglioma	G2	>50<=70	male	1.12603	0	1.12603	0	Mutant	non-codel	Methylated	NA	Not expressed	wildtype
TCGA-VM-A8CB	oligodendroglioma	G3	>30<=50	male	0.00821918	0	0.00821918	0	Mutant	codel	Methylated	NA	Expressed	wildtype
TCGA-VM-A8CD	astrocytoma	G3	>50<=70	male	0.657534	1	0.657534	1	wildtype	non-codel	Unmethylated	NA	Expressed	wildtype
TCGA-VM-A8CE	oligodendroglioma	G2	<=30	male	3.26301	0	2.23288	1	Mutant	codel	Methylated	NA	Expressed	wildtype
TCGA-VM-A8CF	NA	G3	>30<=50	NA	1.66849	0	1.66849	0	Mutant	non-codel	Methylated	NA	Not expressed	Mutant
TCGA-VM-A8CH	astrocytoma	G2	<=30	female	1.95616	0	1.95616	0	Mutant	non-codel	Unmethylated	NA	Not expressed	Mutant
TCGA-VV-A829	oligoastrocytoma	G3	>30<=50	male	3.08767	0	3.08767	0	Mutant	codel	Methylated	NA	Expressed	wildtype
TCGA-VV-A86M	astrocytoma	G3	>30<=50	female	1.33425	0	1.33425	0	Mutant	non-codel	Methylated	NA	Not expressed	wildtype
TCGA-VW-A7QS	oligodendroglioma	G3	>30<=50	female	1.93425	0	1.93425	0	Mutant	codel	Methylated	NA	Expressed	wildtype
TCGA-VW-A8FI	astrocytoma	G3	>50<=70	male	0.671233	1	0.671233	1	wildtype	non-codel	Unmethylated	NA	Expressed	wildtype
TCGA-W9-A837	oligodendroglioma	G2	>30<=50	male	4.25479	0	4.25479	0	Mutant	codel	Methylated	NA	Expressed	wildtype
TCGA-WH-A86K	astrocytoma	G2	>50<=70	male	1.10959	0	1.10959	0	Mutant	non-codel	Methylated	NA	Not expressed	wildtype
TCGA-WY-A858	astrocytoma	G3	>30<=50	female	3.66301	0	3.66301	0	Mutant	non-codel	Methylated	NA	Not expressed	Mutant
TCGA-WY-A859	NA	G2	>30<=50	NA	3.32329	0	3.32329	0	Mutant	non-codel	Methylated	NA	Not expressed	wildtype
TCGA-WY-A85A	NA	G2	<=30	NA	3.61644	0	3.61644	0	Mutant	non-codel	Methylated	NA	Not expressed	Mutant
TCGA-WY-A85B	NA	G2	<=30	NA	3.81644	0	3.81644	0	Mutant	non-codel	Methylated	NA	Not expressed	Mutant
TCGA-WY-A85C	NA	G2	>30<=50	NA	3.90685	0	2.21644	1	Mutant	non-codel	Methylated	NA	Not expressed	wildtype
TCGA-WY-A85D	NA	G2	>50<=70	NA	3.14247	0	2.43014	1	Mutant	non-codel	Unmethylated	NA	Not expressed	Mutant
TCGA-WY-A85E	NA	G2	>30<=50	NA	1.73425	0	1.45753	1	Mutant	non-codel	Methylated	NA	Not expressed	Mutant

## Sheet: CGGA
CGGA_ID	PRS_type	Histology	Grade	Gender	Age	OS (day)	Censor	Radio_status	Chemo_status	IDH_mutation_status	1p19q_codeletion_status
CGGA_1059	Recurrent	rA	WHO II	Female	54	21	1	1	0	Mutant	Non-codel
CGGA_1215	Recurrent	rAOA	WHO III	Male	37	29	1	1	1	Mutant	Non-codel
CGGA_1688	Recurrent	rAA	WHO III	Female	51	51	1	1	1	Wildtype	Non-codel
CGGA_D56	Recurrent	rAOA	WHO III	Male	45	64	1	1	0	Mutant	Non-codel
CGGA_457	Recurrent	rAOA	WHO III	Male	32	75	1	0	0	Mutant	Non-codel
CGGA_1514	Primary	OA	WHO II	Female	57	76	1	0	0	Wildtype	NA
CGGA_1434	Recurrent	rAA	WHO III	Male	61	81	1	1	1	Wildtype	Non-codel
CGGA_406	Recurrent	rAOA	WHO III	Female	24	90	1	0	0	Mutant	Non-codel
CGGA_1284	Primary	AA	WHO III	Male	73	97	1	0	1	Wildtype	Non-codel
CGGA_P29	Recurrent	rAOA	WHO III	Female	22	103	1	0	1	Mutant	NA
CGGA_1862	Primary	AA	WHO III	Male	40	110	1	1	1	Wildtype	Non-codel
CGGA_358	Recurrent	rAOA	WHO III	Female	30	122	1	0	0	Mutant	Non-codel
CGGA_1458	Recurrent	rAOA	WHO III	Female	54	127	1	1	1	Mutant	Codel
CGGA_1575	Recurrent	rAOA	WHO III	Male	37	129	1	1	0	Mutant	Non-codel
CGGA_554	Recurrent	rAOA	WHO III	Female	46	134	1	1	0	NA	Non-codel
CGGA_2013	Recurrent	rA	WHO II	Male	41	139	1	1	NA	Mutant	Codel
CGGA_1669	Primary	AOA	WHO III	Female	44	139	1	0	0	Wildtype	Non-codel
CGGA_1374	Recurrent	rAOA	WHO III	Male	22	141	1	1	NA	Mutant	Non-codel
CGGA_1334	Primary	OA	WHO II	Female	33	146	1	1	1	Wildtype	Non-codel
CGGA_1184	Recurrent	rAOA	WHO III	Male	46	156	1	1	1	Mutant	Non-codel
CGGA_256	Primary	A	WHO II	Male	39	158	0	1	1	Mutant	Non-codel
CGGA_252	Primary	A	WHO II	Female	24	165	0	1	0	Mutant	Non-codel
CGGA_P104	Recurrent	rAOA	WHO III	Female	36	167	1	1	1	Mutant	NA
CGGA_603	Recurrent	rAA	WHO III	Male	32	168	0	1	1	Mutant	Non-codel
CGGA_852	Primary	AA	WHO III	Male	40	169	1	1	0	Wildtype	Non-codel
CGGA_D33	Recurrent	rAA	WHO III	Male	38	175	1	0	0	Mutant	Non-codel
CGGA_D58	Recurrent	rAA	WHO III	Male	24	181	1	0	0	Wildtype	Codel
CGGA_165	Primary	A	WHO II	Male	34	183	0	1	0	NA	Non-codel
CGGA_1544	Primary	AOA	WHO III	Female	38	208	1	0	0	Mutant	Non-codel
CGGA_P159	Primary	AOA	WHO III	Male	59	211	1	0	0	Wildtype	Non-codel
CGGA_1101	Primary	OA	WHO II	Female	35	214	1	0	0	Wildtype	NA
CGGA_1081	Recurrent	rAA	WHO III	Female	30	216	1	1	0	Wildtype	Non-codel
CGGA_D48	Recurrent	rAOA	WHO III	Female	23	221	1	1	0	Mutant	Non-codel
CGGA_P310	Recurrent	rAA	WHO III	Female	47	224	1	NA	NA	NA	Codel
CGGA_1685	Recurrent	rAA	WHO III	Male	33	225	1	1	1	Mutant	Non-codel
CGGA_1145	Recurrent	rAA	WHO III	Male	41	239	1	1	1	Wildtype	Non-codel
CGGA_1010	Primary	A	WHO II	Male	45	246	1	1	1	Mutant	NA
CGGA_881	Recurrent	rAOA	WHO III	Female	23	252	1	1	1	Wildtype	Non-codel
CGGA_791	Primary	AA	WHO III	Male	55	252	1	1	0	Wildtype	Non-codel
CGGA_1094	Recurrent	rAOA	WHO III	Female	40	252	1	0	1	Mutant	Non-codel
CGGA_P266	Primary	AOA	WHO III	Female	28	253	1	1	1	Wildtype	NA
CGGA_1322	Primary	AOA	WHO III	Male	10	253	1	1	1	Mutant	Non-codel
CGGA_1006	Primary	AOA	WHO III	Male	42	254	1	1	1	Wildtype	Non-codel
CGGA_D16	Primary	AOA	WHO III	Female	59	261	1	1	0	Wildtype	Non-codel
CGGA_1014	Primary	A	WHO II	Male	42	263	1	0	1	Wildtype	Non-codel
CGGA_662	Primary	OA	WHO II	Female	59	284	1	0	0	Mutant	Codel
CGGA_1747	Primary	AOA	WHO III	Female	27	293	1	1	1	NA	Non-codel
CGGA_P388	Recurrent	rAA	WHO III	Female	37	293	1	NA	NA	Mutant	Non-codel
CGGA_D19	Recurrent	rO	WHO II	Female	64	297	1	1	1	Mutant	Codel
CGGA_D46	Recurrent	rAA	WHO III	Female	36	300	1	0	1	Mutant	Non-codel
CGGA_1002	Primary	AA	WHO III	Female	43	305	1	1	1	Wildtype	Non-codel
CGGA_P145	Primary	OA	WHO II	Male	53	308	1	1	0	Mutant	Non-codel
CGGA_1447	Recurrent	rAOA	WHO III	Male	48	308	0	1	1	Wildtype	NA
CGGA_P421	Recurrent	rAA	WHO III	Male	26	308	1	NA	NA	Mutant	Non-codel
CGGA_P439	Recurrent	rA	WHO II	Male	45	309	0	1	1	Mutant	Non-codel
CGGA_1295	Recurrent	rAOA	WHO III	Male	40	310	1	1	1	Mutant	Non-codel
CGGA_P438	Recurrent	rAO	WHO III	Male	41	310	0	NA	NA	Mutant	Codel
CGGA_D44	Primary	AOA	WHO III	Female	18	313	1	1	0	Wildtype	Non-codel
CGGA_P98	Recurrent	rAOA	WHO III	Male	44	317	1	1	1	Mutant	Non-codel
CGGA_1181	Primary	OA	WHO II	Male	36	318	0	1	1	Mutant	Non-codel
CGGA_245	Recurrent	rAA	WHO III	Female	39	318	1	1	1	Mutant	Non-codel
CGGA_763	Recurrent	rAOA	WHO III	Male	52	319	0	1	0	Wildtype	Non-codel
CGGA_P270	Recurrent	rA	WHO II	Male	33	322	1	1	1	Mutant	Non-codel
CGGA_1435	Primary	AOA	WHO III	Female	46	324	0	1	0	Mutant	Non-codel
CGGA_1329	Recurrent	rAOA	WHO III	Female	43	326	1	1	1	Mutant	Non-codel
CGGA_507	Recurrent	rAA	WHO III	Female	53	328	1	0	1	Mutant	Non-codel
CGGA_1411	Recurrent	rAA	WHO III	Female	40	329	1	1	1	Wildtype	Non-codel
CGGA_643	Primary	AOA	WHO III	Male	56	331	1	1	1	Wildtype	Non-codel
CGGA_1474	Primary	AO	WHO III	Female	50	333	0	1	1	Mutant	NA
CGGA_1589	Recurrent	rA	WHO II	Male	49	342	1	1	1	Wildtype	Non-codel
CGGA_1359	Recurrent	rAOA	WHO III	Male	21	343	1	1	1	Wildtype	Non-codel
CGGA_1809	Primary	AO	WHO III	Male	27	343	1	1	1	Wildtype	Non-codel
CGGA_P146	Recurrent	rA	WHO II	Male	31	344	0	1	1	Mutant	Non-codel
CGGA_1568	Primary	AA	WHO III	Female	26	345	0	0	0	NA	Non-codel
CGGA_P150	Primary	OA	WHO II	Male	34	349	0	1	0	Mutant	Non-codel
CGGA_1686	Primary	AA	WHO III	Male	27	352	0	0	1	Wildtype	Non-codel
CGGA_448	Primary	AOA	WHO III	Male	64	354	1	1	1	Wildtype	Non-codel
CGGA_P437	Primary	AO	WHO III	Female	47	356	0	1	NA	Mutant	Codel
CGGA_1369	Primary	AO	WHO III	Female	37	360	0	1	1	Mutant	Non-codel
CGGA_578	Primary	AOA	WHO III	Female	61	362	1	1	1	Wildtype	Non-codel
CGGA_108	Recurrent	rAA	WHO III	Male	44	366	1	1	1	Wildtype	Non-codel
CGGA_867	Recurrent	rAA	WHO III	Female	40	367	1	0	0	Mutant	Non-codel
CGGA_P5	Recurrent	rAA	WHO III	Female	45	378	1	1	1	Mutant	Non-codel
CGGA_1154	Recurrent	rAOA	WHO III	Female	33	383	1	NA	NA	Mutant	Non-codel
CGGA_678	Recurrent	rAA	WHO III	Male	56	386	1	1	1	Wildtype	Non-codel
CGGA_P18	Primary	AA	WHO III	Male	40	387	1	0	1	Mutant	Non-codel
CGGA_P23	Primary	AA	WHO III	Female	62	392	1	1	1	Wildtype	NA
CGGA_1118	Recurrent	rAA	WHO III	Male	31	398	1	0	0	Mutant	Non-codel
CGGA_P30	Primary	A	WHO II	Male	48	404	1	1	1	Wildtype	Non-codel
CGGA_1183	Primary	AA	WHO III	Female	25	408	1	1	1	Wildtype	Non-codel
CGGA_P416	Recurrent	rAO	WHO III	Male	29	408	0	NA	NA	Mutant	Codel
CGGA_1518	Primary	AOA	WHO III	Female	19	411	1	1	1	Wildtype	Non-codel
CGGA_P27	Primary	OA	WHO II	Female	37	413	0	1	0	Mutant	Non-codel
CGGA_599	Primary	AO	WHO III	Female	66	418	1	1	0	Wildtype	Non-codel
CGGA_458	Recurrent	rOA	WHO II	Male	51	419	1	1	1	Mutant	Non-codel
CGGA_1120	Primary	AOA	WHO III	Female	58	422	1	1	1	Mutant	NA
CGGA_1178	Recurrent	rAOA	WHO III	Male	41	422	1	1	1	Mutant	Non-codel
CGGA_1160	Primary	AOA	WHO III	Female	43	426	1	NA	NA	Mutant	Non-codel
CGGA_P399	Recurrent	rOA	WHO II	Female	41	428	0	NA	NA	Mutant	Codel
CGGA_P422	Primary	OA	WHO II	Female	41	430	0	NA	NA	Mutant	Codel
CGGA_1141	Primary	AOA	WHO III	Male	65	432	1	NA	NA	Wildtype	Non-codel
CGGA_1660	Primary	OA	WHO II	Male	41	433	0	1	1	Wildtype	Codel
CGGA_P11	Primary	A	WHO II	Female	38	433	0	NA	NA	Mutant	Non-codel
CGGA_488	Primary	AOA	WHO III	Male	23	435	1	1	1	Wildtype	Non-codel
CGGA_P392	Recurrent	rA	WHO II	Male	35	437	0	0	1	Mutant	Codel
CGGA_1280	Primary	AA	WHO III	Male	74	447	1	1	1	Wildtype	Non-codel
CGGA_892	Primary	O	WHO II	Male	34	448	0	1	NA	Mutant	Codel
CGGA_P315	Recurrent	rOA	WHO II	Female	47	451	1	1	0	Mutant	Non-codel
CGGA_1760	Recurrent	rA	WHO II	Male	51	459	1	1	1	Wildtype	Non-codel
CGGA_1510	Recurrent	rAOA	WHO III	Male	40	465	1	1	1	Mutant	Non-codel
CGGA_1738	Primary	AA	WHO III	Male	49	469	1	1	1	Wildtype	Non-codel
CGGA_P157	Primary	AOA	WHO III	Female	55	470	1	1	1	Wildtype	Non-codel
CGGA_1606	Primary	AOA	WHO III	Female	28	471	1	1	1	Wildtype	Non-codel
CGGA_1079	Primary	AOA	WHO III	Male	38	471	1	NA	NA	Wildtype	Non-codel
CGGA_652	Recurrent	rAA	WHO III	Male	42	476	1	1	1	Mutant	Non-codel
CGGA_1594	Recurrent	rA	WHO II	Male	25	480	0	0	1	NA	Non-codel
CGGA_1388	Recurrent	rAA	WHO III	Male	37	485	1	1	1	Mutant	Non-codel
CGGA_P364	Recurrent	rAA	WHO III	Female	41	495	1	1	NA	Mutant	Non-codel
CGGA_P185	Recurrent	rAA	WHO III	Female	41	502	1	1	1	Mutant	Non-codel
CGGA_P358	Recurrent	rOA	WHO II	Male	44	504	0	NA	1	Mutant	Non-codel
CGGA_P356	Recurrent	rOA	WHO II	Female	22	506	0	NA	NA	Mutant	Non-codel
CGGA_P269	Recurrent	rAO	WHO III	Female	47	511	1	1	1	Wildtype	Codel
CGGA_521	Primary	AA	WHO III	Male	32	514	1	1	1	Wildtype	Non-codel
CGGA_1739	Recurrent	rAOA	WHO III	Male	45	515	1	1	1	Mutant	Non-codel
CGGA_2006	Recurrent	rAA	WHO III	Male	43	516	0	1	1	Mutant	Non-codel
CGGA_835	Primary	O	WHO II	Male	31	517	0	1	NA	Mutant	Codel
CGGA_1693	Primary	AO	WHO III	Male	61	517	1	1	1	NA	Non-codel
CGGA_1487	Recurrent	rAA	WHO III	Female	49	520	1	1	1	Wildtype	Non-codel
CGGA_P346	Recurrent	rOA	WHO II	Male	42	522	0	NA	NA	Mutant	Non-codel
CGGA_1459	Recurrent	rAOA	WHO III	Male	55	522	0	1	1	Wildtype	Non-codel
CGGA_2002	Recurrent	rA	WHO II	Male	40	524	0	1	1	Mutant	Non-codel
CGGA_276	Primary	O	WHO II	Male	44	529	0	0	0	Mutant	Non-codel
CGGA_P338	Recurrent	rO	WHO II	Male	51	532	0	1	NA	Wildtype	Non-codel
CGGA_P337	Recurrent	rAO	WHO III	Female	61	532	0	NA	NA	Mutant	Codel
CGGA_1061	Recurrent	rAOA	WHO III	Female	43	532	1	1	1	Mutant	Non-codel
CGGA_1553	Recurrent	rAOA	WHO III	Male	30	540	1	1	1	Mutant	Non-codel
CGGA_P328	Recurrent	rAA	WHO III	Female	54	546	0	1	NA	Mutant	Non-codel
CGGA_619	Recurrent	rA	WHO II	Male	40	550	1	1	0	Wildtype	Non-codel
CGGA_810	Recurrent	rAO	WHO III	Male	20	551	1	1	1	Wildtype	Non-codel
CGGA_P326	Recurrent	rAA	WHO III	Female	48	551	0	0	0	Mutant	Non-codel
CGGA_1398	Recurrent	rAOA	WHO III	Male	43	554	1	1	1	Mutant	Non-codel
CGGA_796	Primary	A	WHO II	Male	60	559	0	1	1	Wildtype	Non-codel
CGGA_P308	Recurrent	rAA	WHO III	Male	38	563	1	1	1	Mutant	Non-codel
CGGA_1598	Primary	AOA	WHO III	Male	31	564	1	1	1	Wildtype	Non-codel
CGGA_P319	Recurrent	rAOA	WHO III	Male	37	565	0	1	NA	Mutant	Non-codel
CGGA_P316	Recurrent	rA	WHO II	Male	44	567	0	1	0	NA	Non-codel
CGGA_P314	Recurrent	rAO	WHO III	Female	34	572	0	0	0	Mutant	Codel
CGGA_632	Primary	OA	WHO II	Female	29	576	1	1	1	Mutant	Non-codel
CGGA_P311	Recurrent	rA	WHO II	Male	36	581	0	NA	NA	Mutant	Non-codel
CGGA_P306	Recurrent	rO	WHO II	Male	49	592	0	1	NA	Mutant	Codel
CGGA_1148	Primary	A	WHO II	Male	37	596	1	1	1	Mutant	Non-codel
CGGA_1680	Primary	AA	WHO III	Male	45	596	1	1	1	Mutant	Non-codel
CGGA_P165	Primary	AOA	WHO III	Female	51	598	1	1	1	Mutant	NA
CGGA_247	Primary	AA	WHO III	Male	60	609	1	1	1	Mutant	Non-codel
CGGA_P298	Recurrent	rAO	WHO III	Female	50	634	0	1	0	Mutant	Codel
CGGA_492	Recurrent	rAOA	WHO III	Male	27	652	0	1	1	Wildtype	Non-codel
CGGA_P286	Recurrent	rOA	WHO II	Female	57	658	0	NA	NA	Mutant	Codel
CGGA_P279	Recurrent	rAO	WHO III	Female	47	668	0	1	1	Mutant	Codel
CGGA_888	Recurrent	rAO	WHO III	Male	29	669	1	1	1	Mutant	Codel
CGGA_1226	Primary	A	WHO II	Female	33	670	1	1	1	Wildtype	Non-codel
CGGA_564	Primary	AA	WHO III	Male	47	679	1	1	1	Wildtype	Non-codel
CGGA_1223	Primary	AOA	WHO III	Male	42	682	1	1	1	Wildtype	Non-codel
CGGA_1087	Primary	OA	WHO II	Female	36	701	0	0	1	Mutant	Codel
CGGA_1321	Primary	AOA	WHO III	Male	46	702	1	1	1	Mutant	Non-codel
CGGA_1048	Primary	OA	WHO II	Female	27	703	0	0	1	Wildtype	Non-codel
CGGA_236	Primary	O	WHO II	Male	47	706	0	1	1	Mutant	Codel
CGGA_P271	Primary	A	WHO II	Male	42	710	0	1	0	Mutant	NA
CGGA_1066	Primary	A	WHO II	Female	34	723	1	1	0	Mutant	Non-codel
CGGA_659	Primary	O	WHO II	Female	50	730	0	1	1	Wildtype	Non-codel
CGGA_1185	Recurrent	rAOA	WHO III	Female	50	731	1	1	1	Wildtype	Non-codel
CGGA_P265	Primary	AOA	WHO III	Male	36	733	0	1	1	Wildtype	NA
CGGA_1157	Primary	A	WHO II	Male	64	741	1	1	1	Wildtype	Non-codel
CGGA_1850	Primary	OA	WHO II	Male	29	750	0	0	1	Mutant	Non-codel
CGGA_1587	Primary	AA	WHO III	Female	30	750	1	0	0	Mutant	Non-codel
CGGA_1034	Primary	AA	WHO III	Male	23	753	1	1	0	Wildtype	Non-codel
CGGA_1619	Primary	AA	WHO III	Male	44	766	1	1	1	Mutant	Non-codel
CGGA_1263	Primary	AA	WHO III	Male	50	772	1	1	0	Wildtype	Non-codel
CGGA_904	Primary	A	WHO II	Male	33	774	1	1	0	Mutant	Non-codel
CGGA_P177	Primary	OA	WHO II	Male	43	776	0	1	0	Wildtype	Non-codel
CGGA_P179	Primary	OA	WHO II	Female	53	778	0	1	1	Mutant	Non-codel
CGGA_1906	Recurrent	rAA	WHO III	Male	57	779	0	1	1	Mutant	Non-codel
CGGA_1037	Primary	A	WHO II	Male	44	780	0	1	0	NA	Codel
CGGA_D50	Recurrent	rOA	WHO II	Male	30	782	1	0	0	Mutant	Codel
CGGA_P173	Primary	OA	WHO II	Male	31	782	0	1	0	Mutant	Non-codel
CGGA_1126	Primary	AOA	WHO III	Male	44	784	1	1	1	Mutant	Non-codel
CGGA_1903	Primary	AOA	WHO III	Female	24	785	0	1	1	NA	Codel
CGGA_1902	Primary	OA	WHO II	Male	33	790	0	0	0	Mutant	Non-codel
CGGA_P110	Primary	AO	WHO III	Female	56	800	1	1	1	Wildtype	Non-codel
CGGA_1829	Primary	OA	WHO II	Male	23	801	0	0	0	Wildtype	Non-codel
CGGA_P172	Primary	AA	WHO III	Male	33	803	0	1	1	Mutant	NA
CGGA_P176	Primary	OA	WHO II	Female	32	804	0	1	0	Mutant	Codel
CGGA_P183	Primary	AO	WHO III	Male	58	807	0	1	1	Mutant	Codel
CGGA_1473	Recurrent	rAA	WHO III	Female	28	813	0	1	1	NA	Non-codel
CGGA_P174	Primary	OA	WHO II	Male	31	816	0	1	1	Mutant	Codel
CGGA_P155	Primary	A	WHO II	Male	50	817	0	1	0	Wildtype	Non-codel
CGGA_P153	Primary	A	WHO II	Male	45	818	0	0	0	Mutant	NA
CGGA_P156	Primary	O	WHO II	Male	30	822	0	0	0	Mutant	Codel
CGGA_D11	Primary	AOA	WHO III	Female	53	827	1	1	1	Wildtype	Non-codel
CGGA_1718	Primary	AA	WHO III	Female	37	835	0	1	1	Mutant	Non-codel
CGGA_825	Recurrent	rAA	WHO III	Male	36	836	1	1	1	Mutant	Non-codel
CGGA_D24	Primary	AOA	WHO III	Female	37	837	1	1	0	Mutant	Non-codel
CGGA_1051	Primary	A	WHO II	Male	47	838	1	NA	NA	Wildtype	Codel
CGGA_1536	Primary	OA	WHO II	Male	53	840	1	0	0	Mutant	Non-codel
CGGA_1567	Primary	AO	WHO III	Female	48	840	1	1	1	Mutant	Non-codel
CGGA_1651	Recurrent	rA	WHO II	Female	44	842	1	1	1	Mutant	Non-codel
CGGA_1882	Primary	AOA	WHO III	Male	33	842	0	0	0	Mutant	Codel
CGGA_P158	Primary	OA	WHO II	Male	27	844	0	1	0	Mutant	NA
CGGA_1791	Primary	AA	WHO III	Male	55	855	1	1	1	Wildtype	NA
CGGA_1880	Recurrent	rAA	WHO III	Female	37	855	0	0	0	Mutant	Non-codel
CGGA_D45	Recurrent	rAOA	WHO III	Male	32	856	0	1	1	Mutant	Non-codel
CGGA_P137	Primary	A	WHO II	Male	42	860	0	1	1	Mutant	Non-codel
CGGA_D28	Primary	AA	WHO III	Male	25	860	1	1	0	Mutant	Non-codel
CGGA_P147	Primary	OA	WHO II	Male	52	863	1	1	0	Mutant	Non-codel
CGGA_1875	Primary	OA	WHO II	Female	22	866	0	1	1	Wildtype	Non-codel
CGGA_1108	Primary	AOA	WHO III	Female	39	870	1	1	1	Wildtype	Non-codel
CGGA_1715	Primary	O	WHO II	Female	12	872	0	0	0	Wildtype	Non-codel
CGGA_P163	Recurrent	rAO	WHO III	Female	45	880	0	1	1	Mutant	Non-codel
CGGA_1383	Recurrent	rAA	WHO III	Female	47	884	0	1	NA	Mutant	Codel
CGGA_P142	Primary	AOA	WHO III	Male	45	891	0	1	1	Mutant	Codel
CGGA_P144	Primary	AOA	WHO III	Male	44	892	0	1	1	Mutant	Non-codel
CGGA_861	Primary	AOA	WHO III	Male	29	893	1	0	0	Wildtype	Non-codel
CGGA_1004	Primary	A	WHO II	Female	63	899	1	1	0	Wildtype	Non-codel
CGGA_1863	Recurrent	rAOA	WHO III	Female	50	902	0	1	1	Mutant	Codel
CGGA_157	Recurrent	rA	WHO II	Male	34	914	1	1	1	NA	Non-codel
CGGA_P151	Primary	OA	WHO II	Female	46	915	0	1	1	Mutant	Non-codel
CGGA_P128	Primary	OA	WHO II	Male	41	919	0	1	0	Mutant	Non-codel
CGGA_1140	Recurrent	rAA	WHO III	Female	49	921	1	0	1	Wildtype	Non-codel
CGGA_780	Recurrent	rAO	WHO III	Female	64	923	1	0	1	Wildtype	Non-codel
CGGA_1695	Recurrent	rAA	WHO III	Male	45	927	0	1	1	Mutant	Non-codel
CGGA_901	Primary	AOA	WHO III	Male	40	928	1	NA	1	Mutant	Non-codel
CGGA_1205	Primary	AOA	WHO III	Female	59	929	1	1	1	Wildtype	NA
CGGA_P131	Primary	AOA	WHO III	Female	45	929	0	1	1	Mutant	Codel
CGGA_1854	Primary	AA	WHO III	Male	36	934	0	1	1	Mutant	Non-codel
CGGA_P132	Primary	OA	WHO II	Male	42	936	0	1	0	Mutant	Codel
CGGA_P121	Primary	OA	WHO II	Male	39	941	0	1	0	Wildtype	Non-codel
CGGA_1356	Recurrent	rAOA	WHO III	Male	52	948	1	0	1	Mutant	Non-codel
CGGA_616	Primary	AA	WHO III	Male	43	952	1	1	1	Wildtype	Non-codel
CGGA_P115	Primary	OA	WHO II	Male	25	959	0	1	0	Wildtype	NA
CGGA_1309	Primary	AO	WHO III	Male	65	964	0	1	1	NA	Codel
CGGA_P111	Primary	OA	WHO II	Female	44	971	0	1	0	Mutant	Codel
CGGA_P122	Recurrent	rOA	WHO II	Male	43	971	0	1	1	Mutant	Codel
CGGA_1731	Primary	AOA	WHO III	Female	45	972	0	1	1	Mutant	Non-codel
CGGA_P108	Primary	AOA	WHO III	Female	30	976	0	1	1	Wildtype	Non-codel
CGGA_1675	Primary	AA	WHO III	Male	38	980	0	1	1	Mutant	Non-codel
CGGA_P103	Primary	OA	WHO II	Male	34	983	0	1	0	Mutant	Codel
CGGA_1058	Recurrent	rA	WHO II	Male	34	995	1	1	1	Mutant	Non-codel
CGGA_882	Recurrent	rAOA	WHO III	Male	30	1008	0	1	0	Mutant	Non-codel
CGGA_337	Primary	AOA	WHO III	Female	50	1008	1	NA	NA	Mutant	Non-codel
CGGA_P93	Primary	A	WHO II	Female	45	1010	0	0	0	Mutant	Non-codel
CGGA_887	Recurrent	rAO	WHO III	Male	25	1011	0	0	NA	Wildtype	Non-codel
CGGA_883	Recurrent	rA	WHO II	Female	39	1016	0	0	NA	Mutant	Non-codel
CGGA_727	Primary	AA	WHO III	Male	45	1023	1	1	1	Wildtype	Non-codel
CGGA_P84	Primary	A	WHO II	Female	40	1026	0	1	0	Mutant	Non-codel
CGGA_P86	Primary	O	WHO II	Female	34	1026	0	1	0	Mutant	Codel
CGGA_J023	Primary	AO	WHO III	Male	36	1028	1	1	1	Mutant	Non-codel
CGGA_P83	Primary	A	WHO II	Female	28	1030	0	1	1	Mutant	Non-codel
CGGA_P113	Primary	OA	WHO II	Male	32	1032	0	1	0	Wildtype	Non-codel
CGGA_1437	Recurrent	rAOA	WHO III	Male	48	1037	1	1	1	Wildtype	Non-codel
CGGA_862	Recurrent	rA	WHO II	Male	30	1046	0	0	NA	Mutant	Non-codel
CGGA_1649	Primary	OA	WHO II	Male	36	1047	0	1	1	Mutant	Codel
CGGA_757	Primary	A	WHO II	Male	45	1047	1	1	1	Mutant	Non-codel
CGGA_D47	Primary	OA	WHO II	Male	36	1048	1	1	1	Mutant	Codel
CGGA_1508	Primary	AOA	WHO III	Male	39	1049	1	0	0	Mutant	Non-codel
CGGA_288	Recurrent	rO	WHO II	Male	49	1057	1	1	0	Mutant	Codel
CGGA_1610	Recurrent	rAOA	WHO III	Male	39	1058	1	1	1	NA	Codel
CGGA_1771	Recurrent	rAOA	WHO III	Male	38	1068	1	1	1	Mutant	Non-codel
CGGA_1701	Primary	AOA	WHO III	Male	44	1072	0	1	1	Mutant	Codel
CGGA_1614	Recurrent	rAA	WHO III	Male	51	1079	1	1	1	Mutant	Non-codel
CGGA_1311	Recurrent	rAOA	WHO III	Female	29	1080	1	1	1	Mutant	Codel
CGGA_28	Primary	A	WHO II	Male	25	1103	1	1	0	Mutant	Codel
CGGA_1340	Primary	AOA	WHO III	Male	35	1109	1	1	1	Wildtype	Non-codel
CGGA_1020	Primary	A	WHO II	Female	38	1120	1	1	0	Mutant	Non-codel
CGGA_330	Primary	AOA	WHO III	Male	45	1121	1	1	1	Wildtype	Non-codel
CGGA_1786	Recurrent	rAO	WHO III	Female	54	1128	0	1	1	Mutant	Codel
CGGA_884	Primary	A	WHO II	Female	48	1131	1	1	1	Mutant	Non-codel
CGGA_601	Primary	A	WHO II	Male	36	1133	1	1	0	Mutant	Non-codel
CGGA_1591	Recurrent	rAOA	WHO III	Male	54	1133	1	1	1	Mutant	Non-codel
CGGA_J73	Primary	AO	WHO III	Female	34	1134	1	1	1	Mutant	NA
CGGA_1670	Recurrent	rAA	WHO III	Female	30	1141	0	1	1	Wildtype	Non-codel
CGGA_1497	Primary	AOA	WHO III	Female	24	1178	1	1	1	Mutant	Non-codel
CGGA_103	Primary	AA	WHO III	Male	56	1188	1	1	0	Mutant	Non-codel
CGGA_1477	Primary	OA	WHO II	Male	43	1194	1	1	1	NA	Non-codel
CGGA_694	Recurrent	rA	WHO II	Male	34	1194	1	1	1	Mutant	Non-codel
CGGA_P21	Primary	A	WHO II	Male	25	1195	0	1	1	Mutant	Non-codel
CGGA_P20	Primary	A	WHO II	Female	58	1196	0	1	0	Mutant	Non-codel
CGGA_P19	Primary	OA	WHO II	Male	39	1197	0	1	0	Mutant	Non-codel
CGGA_P17	Primary	AOA	WHO III	Male	30	1203	0	1	1	Mutant	Codel
CGGA_P31	Primary	A	WHO II	Male	42	1205	0	0	1	Wildtype	Non-codel
CGGA_1696	Primary	AA	WHO III	Male	72	1205	0	1	1	Wildtype	NA
CGGA_D21	Primary	AA	WHO III	Female	37	1208	1	1	0	Mutant	Non-codel
CGGA_1655	Primary	OA	WHO II	Male	48	1209	0	1	0	Mutant	Non-codel
CGGA_P13	Primary	OA	WHO II	Female	40	1211	0	0	0	Mutant	Codel
CGGA_1533	Recurrent	rAOA	WHO III	Female	61	1217	1	1	1	Wildtype	Non-codel
CGGA_1745	Primary	AOA	WHO III	Female	45	1225	0	1	1	Mutant	NA
CGGA_1524	Recurrent	rAOA	WHO III	Male	36	1226	0	1	1	Mutant	Codel
CGGA_1743	Primary	AOA	WHO III	Female	47	1232	0	0	0	Mutant	Non-codel
CGGA_1737	Primary	AO	WHO III	Male	33	1248	0	1	1	Mutant	Codel
CGGA_809	Primary	A	WHO II	Male	26	1252	1	1	1	Mutant	Non-codel
CGGA_720	Recurrent	rA	WHO II	Female	46	1258	1	1	0	Mutant	Non-codel
CGGA_1113	Primary	AOA	WHO III	Male	34	1265	1	0	1	Mutant	Codel
CGGA_1723	Primary	AOA	WHO III	Female	39	1282	0	1	1	Mutant	Codel
CGGA_1725	Primary	AOA	WHO III	Female	33	1282	0	1	1	Mutant	Codel
CGGA_1720	Primary	OA	WHO II	Male	35	1290	0	1	1	Mutant	Non-codel
CGGA_1721	Primary	AO	WHO III	Female	46	1290	0	1	1	NA	Codel
CGGA_856	Primary	O	WHO II	Male	53	1297	0	1	NA	Mutant	Codel
CGGA_251	Primary	OA	WHO II	Male	45	1299	0	1	0	Mutant	Non-codel
CGGA_279	Recurrent	rAOA	WHO III	Female	49	1314	1	1	1	Mutant	Non-codel
CGGA_400	Recurrent	rAA	WHO III	Female	38	1321	1	1	0	Mutant	Non-codel
CGGA_1033	Primary	OA	WHO II	Male	44	1322	0	0	1	NA	Non-codel
CGGA_1714	Primary	AOA	WHO III	Female	37	1330	0	1	1	NA	Codel
CGGA_1716	Recurrent	rAA	WHO III	Male	38	1332	0	1	1	Mutant	Non-codel
CGGA_1607	Recurrent	rOA	WHO II	Female	35	1333	1	1	1	Mutant	Codel
CGGA_621	Recurrent	rAOA	WHO III	Male	40	1347	0	1	1	Mutant	Non-codel
CGGA_703	Recurrent	rAO	WHO III	Female	31	1355	1	1	1	Mutant	Non-codel
CGGA_1704	Primary	A	WHO II	Female	32	1360	0	1	0	Wildtype	Non-codel
CGGA_1408	Primary	AOA	WHO III	Female	64	1362	1	1	1	Wildtype	Non-codel
CGGA_1703	Primary	OA	WHO II	Female	30	1366	0	1	1	Mutant	Non-codel
CGGA_1389	Primary	AOA	WHO III	Female	67	1370	1	1	0	Mutant	Codel
CGGA_1700	Primary	AOA	WHO III	Male	49	1372	0	1	1	Mutant	Codel
CGGA_1155	Primary	AA	WHO III	Male	43	1373	1	1	1	Mutant	Codel
CGGA_267	Primary	A	WHO II	Male	36	1374	1	0	0	Mutant	Non-codel
CGGA_1097	Primary	OA	WHO II	Male	30	1378	1	1	1	Wildtype	Non-codel
CGGA_607	Primary	A	WHO II	Male	25	1389	0	1	0	Mutant	Non-codel
CGGA_580	Primary	OA	WHO II	Male	43	1394	1	1	0	Mutant	Non-codel
CGGA_P3	Recurrent	rAOA	WHO III	Male	32	1399	0	1	0	Mutant	NA
CGGA_1569	Primary	AOA	WHO III	Female	27	1406	0	0	0	Wildtype	Codel
CGGA_1630	Primary	O	WHO II	Male	26	1407	0	0	0	NA	Codel
CGGA_J042	Recurrent	rOA	WHO II	Male	38	1409	1	0	0	Mutant	Non-codel
CGGA_1689	Primary	A	WHO II	Male	45	1414	0	1	0	Mutant	Non-codel
CGGA_1565	Primary	AOA	WHO III	Female	23	1417	0	0	0	Mutant	Non-codel
CGGA_1620	Primary	AOA	WHO III	Male	51	1427	0	1	1	Mutant	Codel
CGGA_1300	Primary	AOA	WHO III	Male	35	1428	1	1	1	Mutant	Non-codel
CGGA_1679	Primary	AOA	WHO III	Female	52	1442	0	1	1	Mutant	Codel
CGGA_903	Primary	AOA	WHO III	Female	27	1455	1	1	0	Mutant	Non-codel
CGGA_1673	Primary	OA	WHO II	Female	23	1457	0	0	0	Mutant	Non-codel
CGGA_1671	Primary	AOA	WHO III	Female	26	1464	0	1	1	Mutant	Non-codel
CGGA_1667	Primary	AO	WHO III	Female	40	1476	0	1	1	Mutant	Codel
CGGA_1664	Primary	O	WHO II	Female	40	1491	0	1	0	Mutant	Non-codel
CGGA_1662	Primary	OA	WHO II	Female	55	1493	0	1	0	Mutant	Codel
CGGA_1318	Primary	OA	WHO II	Male	39	1497	0	1	0	Mutant	Non-codel
CGGA_1661	Primary	AA	WHO III	Female	42	1505	0	1	1	NA	Non-codel
CGGA_705	Primary	AA	WHO III	Male	41	1507	1	1	0	Mutant	Non-codel
CGGA_1657	Primary	AOA	WHO III	Female	20	1511	0	0	0	NA	Non-codel
CGGA_1579	Primary	OA	WHO II	Male	37	1512	0	0	0	Wildtype	Non-codel
CGGA_1653	Primary	OA	WHO II	Female	47	1513	0	1	0	NA	Non-codel
CGGA_1648	Primary	AOA	WHO III	Female	45	1521	0	1	1	NA	Codel
CGGA_1647	Primary	O	WHO II	Male	40	1525	0	1	1	NA	Codel
CGGA_112	Primary	OA	WHO II	Male	17	1534	1	1	1	Mutant	Non-codel
CGGA_1645	Primary	AA	WHO III	Male	59	1534	0	1	1	Mutant	Non-codel
CGGA_1057	Primary	OA	WHO II	Female	57	1549	1	1	1	Wildtype	Non-codel
CGGA_426	Primary	AA	WHO III	Male	50	1560	1	1	1	Wildtype	Non-codel
CGGA_1642	Primary	A	WHO II	Male	48	1562	0	1	0	Mutant	Non-codel
CGGA_1640	Primary	AOA	WHO III	Male	55	1563	0	1	1	NA	Non-codel
CGGA_1580	Primary	AA	WHO III	Female	34	1581	1	1	1	Mutant	Non-codel
CGGA_1592	Recurrent	rAOA	WHO III	Male	37	1588	1	1	1	Mutant	Codel
CGGA_1627	Primary	AOA	WHO III	Male	37	1597	0	1	1	Mutant	Non-codel
CGGA_1623	Primary	AOA	WHO III	Female	16	1603	0	1	0	Wildtype	Non-codel
CGGA_1583	Primary	OA	WHO II	Female	51	1606	1	1	1	NA	Non-codel
CGGA_1621	Primary	OA	WHO II	Female	48	1607	0	0	0	Mutant	Non-codel
CGGA_1617	Primary	O	WHO II	Female	35	1611	0	1	0	NA	Codel
CGGA_1055	Primary	AA	WHO III	Male	43	1611	1	1	1	Mutant	Non-codel
CGGA_1618	Primary	AOA	WHO III	Male	31	1615	0	1	1	Mutant	Non-codel
CGGA_1608	Recurrent	rAA	WHO III	Male	38	1629	0	1	0	Mutant	Non-codel
CGGA_1463	Primary	O	WHO II	Female	69	1630	0	1	0	Mutant	Codel
CGGA_591	Primary	AOA	WHO III	Female	50	1654	1	1	1	Mutant	Non-codel
CGGA_898	Primary	A	WHO II	Male	38	1663	1	1	NA	Mutant	Non-codel
CGGA_1588	Primary	AOA	WHO III	Female	24	1679	0	0	0	Wildtype	Non-codel
CGGA_362	Recurrent	rA	WHO II	Female	39	1680	0	0	NA	Mutant	Codel
CGGA_1401	Primary	AA	WHO III	Male	39	1680	1	1	1	Mutant	Non-codel
CGGA_1525	Primary	AOA	WHO III	Male	41	1686	1	1	1	NA	Non-codel
CGGA_J50	Recurrent	rOA	WHO II	Male	27	1693	1	1	1	Mutant	NA
CGGA_1527	Primary	AOA	WHO III	Male	47	1714	1	1	1	Mutant	Non-codel
CGGA_1566	Primary	AOA	WHO III	Female	43	1716	0	1	1	Mutant	Codel
CGGA_1563	Primary	A	WHO II	Female	32	1719	0	1	0	Wildtype	Non-codel
CGGA_1562	Primary	AO	WHO III	Male	51	1721	0	1	0	Mutant	Codel
CGGA_1557	Primary	AOA	WHO III	Male	47	1723	0	1	1	Mutant	Codel
CGGA_1013	Primary	A	WHO II	Female	38	1725	1	1	1	Mutant	Non-codel
CGGA_1552	Primary	AOA	WHO III	Male	39	1728	0	1	1	Mutant	Codel
CGGA_1169	Primary	AOA	WHO III	Male	30	1765	1	1	1	Mutant	Non-codel
CGGA_333	Primary	OA	WHO II	Male	40	1783	0	1	0	Mutant	Non-codel
CGGA_1528	Primary	O	WHO II	Female	27	1793	0	1	0	Mutant	Codel
CGGA_1530	Primary	AOA	WHO III	Male	41	1793	0	1	1	NA	Non-codel
CGGA_1526	Primary	AOA	WHO III	Male	39	1798	0	1	1	Mutant	Codel
CGGA_1523	Primary	OA	WHO II	Male	50	1804	0	1	1	Mutant	Non-codel
CGGA_633	Primary	O	WHO II	Female	56	1812	1	1	1	Wildtype	Non-codel
CGGA_1516	Primary	OA	WHO II	Male	46	1826	0	1	1	Mutant	Codel
CGGA_1517	Primary	O	WHO II	Male	42	1826	0	1	0	Mutant	Codel
CGGA_1513	Recurrent	rAOA	WHO III	Female	36	1827	0	1	1	Mutant	Codel
CGGA_698	Primary	A	WHO II	Female	61	1851	1	1	1	Mutant	Non-codel
CGGA_1504	Primary	AOA	WHO III	Female	44	1854	0	1	1	Mutant	Non-codel
CGGA_1502	Primary	OA	WHO II	Female	27	1861	0	0	0	Mutant	Codel
CGGA_799	Recurrent	rAOA	WHO III	Male	53	1868	1	1	1	Mutant	Codel
CGGA_1488	Primary	OA	WHO II	Male	31	1882	0	0	0	Mutant	Non-codel
CGGA_1482	Primary	AO	WHO III	Male	38	1888	0	1	1	NA	Codel
CGGA_1273	Recurrent	rAOA	WHO III	Male	64	1912	0	1	1	Mutant	Non-codel
CGGA_1471	Primary	OA	WHO II	Male	45	1919	0	1	1	Mutant	Non-codel
CGGA_1469	Primary	AOA	WHO III	Male	46	1922	0	1	1	Mutant	NA
CGGA_135	Primary	AA	WHO III	Female	41	1924	1	1	0	Wildtype	Non-codel
CGGA_1454	Primary	OA	WHO II	Female	42	1946	0	1	0	Wildtype	Non-codel
CGGA_1455	Primary	O	WHO II	Male	40	1946	0	0	0	Mutant	NA
CGGA_1335	Primary	O	WHO II	Female	43	1947	0	0	1	Mutant	Codel
CGGA_1446	Primary	OA	WHO II	Male	29	1955	0	0	1	Mutant	NA
CGGA_1445	Recurrent	rAOA	WHO III	Male	37	1955	0	1	1	Wildtype	NA
CGGA_1443	Recurrent	rOA	WHO II	Male	41	1956	0	1	NA	Wildtype	Non-codel
CGGA_1440	Primary	O	WHO II	Female	29	1961	0	0	1	Mutant	Codel
CGGA_1431	Primary	AA	WHO III	Male	48	1975	0	1	1	Mutant	Non-codel
CGGA_1424	Primary	AO	WHO III	Female	41	1983	0	1	1	Mutant	NA
CGGA_1421	Primary	AO	WHO III	Male	35	1987	0	1	1	NA	Non-codel
CGGA_1305	Primary	AOA	WHO III	Male	43	1989	0	1	1	Mutant	Non-codel
CGGA_1417	Primary	AOA	WHO III	Male	56	2001	0	1	1	Mutant	Codel
CGGA_1413	Primary	AO	WHO III	Male	35	2008	0	1	1	Mutant	Codel
CGGA_1407	Primary	AO	WHO III	Female	29	2016	0	0	1	Mutant	Codel
CGGA_1404	Primary	AOA	WHO III	Female	56	2029	0	1	0	Mutant	Codel
CGGA_474	Primary	AO	WHO III	Male	NA	2029	0	1	1	Wildtype	Non-codel
CGGA_1400	Recurrent	rAO	WHO III	Female	53	2033	0	1	1	NA	Codel
CGGA_1390	Recurrent	rAOA	WHO III	Male	50	2050	0	1	1	Mutant	Non-codel
CGGA_1386	Primary	AO	WHO III	Male	34	2058	0	1	1	NA	Codel
CGGA_1232	Primary	AOA	WHO III	Male	39	2067	1	1	1	Mutant	Non-codel
CGGA_1377	Primary	AOA	WHO III	Male	28	2068	0	1	1	Mutant	Non-codel
CGGA_863	Primary	A	WHO II	Female	42	2073	1	1	0	Wildtype	Non-codel
CGGA_1368	Primary	O	WHO II	Male	49	2085	0	1	0	Mutant	NA
CGGA_1361	Primary	O	WHO II	Male	40	2092	0	1	1	Mutant	Non-codel
CGGA_1362	Primary	AA	WHO III	Female	64	2092	0	1	1	Wildtype	Non-codel
CGGA_625	Recurrent	rAOA	WHO III	Female	33	2098	1	0	0	Mutant	Codel
CGGA_1350	Primary	O	WHO II	Male	36	2107	0	0	1	Mutant	NA
CGGA_1345	Primary	OA	WHO II	Male	56	2113	0	1	0	Mutant	Codel
CGGA_730	Recurrent	rOA	WHO II	Female	51	2118	1	1	0	Mutant	Codel
CGGA_1339	Primary	O	WHO II	Male	41	2120	0	0	1	Mutant	Codel
CGGA_1319	Primary	AO	WHO III	Female	42	2149	0	1	1	Wildtype	Non-codel
CGGA_1317	Primary	OA	WHO II	Male	45	2152	0	0	1	Mutant	NA
CGGA_1406	Primary	OA	WHO II	Male	34	2154	1	1	1	Mutant	Non-codel
CGGA_107	Recurrent	rAA	WHO III	Female	38	2156	1	0	0	Wildtype	Non-codel
CGGA_1303	Primary	AOA	WHO III	Female	45	2168	0	1	1	Mutant	NA
CGGA_1291	Primary	AO	WHO III	Male	41	2190	0	1	1	NA	Codel
CGGA_1286	Primary	O	WHO II	Female	52	2194	0	1	1	Mutant	Codel
CGGA_300	Primary	A	WHO II	Female	35	2199	1	1	1	Mutant	Non-codel
CGGA_1269	Primary	AO	WHO III	Female	35	2214	0	0	1	Mutant	Codel
CGGA_1264	Primary	AO	WHO III	Female	37	2217	0	0	1	Mutant	Codel
CGGA_815	Primary	OA	WHO II	Female	53	2219	1	1	0	Mutant	Non-codel
CGGA_1231	Recurrent	rAA	WHO III	Female	31	2279	1	1	1	Wildtype	Non-codel
CGGA_1239	Primary	O	WHO II	Female	44	2280	0	1	1	Mutant	Codel
CGGA_1238	Primary	OA	WHO II	Female	11	2282	0	0	0	Wildtype	Non-codel
CGGA_1235	Primary	AO	WHO III	Female	32	2287	0	0	1	Mutant	Non-codel
CGGA_1212	Primary	AOA	WHO III	Male	31	2292	1	1	1	Mutant	Non-codel
CGGA_1228	Primary	OA	WHO II	Male	34	2296	0	0	1	Wildtype	Non-codel
CGGA_194	Recurrent	rAO	WHO III	Female	43	2304	1	1	0	Mutant	Codel
CGGA_1211	Primary	OA	WHO II	Male	40	2324	0	0	0	Mutant	Codel
CGGA_1207	Primary	AOA	WHO III	Female	49	2331	0	0	1	NA	Codel
CGGA_1204	Primary	O	WHO II	Male	53	2338	0	0	1	Mutant	Codel
CGGA_235	Primary	OA	WHO II	Male	24	2340	1	1	1	Mutant	Codel
CGGA_1198	Primary	O	WHO II	Male	30	2349	0	0	1	Mutant	NA
CGGA_1192	Primary	OA	WHO II	Female	43	2363	0	1	1	Mutant	Non-codel
CGGA_1191	Primary	AOA	WHO III	Male	53	2365	0	0	0	Mutant	Codel
CGGA_1330	Primary	A	WHO II	Male	47	2366	0	1	1	Mutant	Non-codel
CGGA_D20	Primary	A	WHO II	Female	40	2367	1	0	0	Mutant	Non-codel
CGGA_493	Primary	A	WHO II	Female	32	2382	1	1	1	Mutant	Non-codel
CGGA_638	Primary	O	WHO II	Male	42	2386	0	1	0	Mutant	Codel
CGGA_1307	Primary	AOA	WHO III	Female	25	2390	0	1	1	Mutant	Non-codel
CGGA_1292	Primary	AOA	WHO III	Male	17	2421	0	1	1	Wildtype	Non-codel
CGGA_1281	Primary	AOA	WHO III	Male	45	2429	0	1	1	Wildtype	Codel
CGGA_908	Primary	A	WHO II	Male	35	2436	1	1	NA	Mutant	Non-codel
CGGA_485	Primary	O	WHO II	Male	31	2437	0	1	0	Mutant	Codel
CGGA_1031	Primary	A	WHO II	Female	31	2457	1	0	1	Mutant	Non-codel
CGGA_1162	Primary	AOA	WHO III	Male	39	2457	0	1	1	NA	Codel
CGGA_1161	Primary	AOA	WHO III	Male	36	2463	0	1	0	Mutant	Non-codel
CGGA_1159	Primary	OA	WHO II	Male	51	2464	0	0	1	Mutant	Non-codel
CGGA_1158	Primary	OA	WHO II	Male	39	2471	0	1	1	Mutant	Codel
CGGA_1156	Primary	OA	WHO II	Female	41	2477	0	1	0	Mutant	Non-codel
CGGA_1152	Primary	A	WHO II	Male	13	2484	0	1	1	Wildtype	Non-codel
CGGA_1246	Primary	AO	WHO III	Male	53	2491	0	1	1	Mutant	Codel
CGGA_1147	Primary	A	WHO II	Male	36	2498	0	0	1	Mutant	Non-codel
CGGA_1146	Primary	AA	WHO III	Male	35	2498	0	1	1	Mutant	Non-codel
CGGA_666	Primary	OA	WHO II	Female	45	2499	1	1	0	Mutant	Codel
CGGA_1144	Primary	AA	WHO III	Female	39	2505	0	1	1	Wildtype	Non-codel
CGGA_J130	Recurrent	rA	WHO II	Male	40	2507	0	1	0	Wildtype	Non-codel
CGGA_482	Primary	OA	WHO II	Male	45	2511	1	1	1	Mutant	Codel
CGGA_1137	Primary	AOA	WHO III	Male	58	2519	0	1	1	Wildtype	NA
CGGA_1018	Recurrent	rO	WHO II	Male	50	2527	1	1	1	Mutant	Codel
CGGA_1131	Primary	AOA	WHO III	Female	46	2533	0	1	1	Mutant	Non-codel
CGGA_1132	Recurrent	rAOA	WHO III	Female	33	2533	0	1	1	Mutant	Codel
CGGA_1127	Primary	O	WHO II	Male	33	2547	0	1	1	NA	Codel
CGGA_336	Recurrent	rAOA	WHO III	Female	57	2549	1	1	1	Mutant	Codel
CGGA_721	Primary	OA	WHO II	Male	45	2552	1	1	1	Mutant	Non-codel
CGGA_1121	Recurrent	rAOA	WHO III	Female	29	2560	0	1	1	Mutant	Non-codel
CGGA_314	Recurrent	rAO	WHO III	Male	39	2568	1	1	1	Mutant	Codel
CGGA_704	Primary	OA	WHO II	Male	36	2572	1	1	1	Mutant	Non-codel
CGGA_1111	Primary	AOA	WHO III	Male	45	2582	0	1	1	Mutant	Non-codel
CGGA_1100	Primary	O	WHO II	Female	61	2596	0	1	1	Mutant	NA
CGGA_1189	Primary	AOA	WHO III	Female	34	2602	0	1	1	Mutant	Codel
CGGA_1190	Primary	AOA	WHO III	Female	45	2602	0	1	1	Mutant	Non-codel
CGGA_634	Primary	AOA	WHO III	Female	35	2633	1	1	1	Mutant	Non-codel
CGGA_273	Primary	OA	WHO II	Female	35	2635	1	1	0	Mutant	Non-codel
CGGA_1065	Primary	OA	WHO II	Female	48	2682	0	1	1	Mutant	Codel
CGGA_1027	Primary	AOA	WHO III	Male	37	2688	0	1	1	Mutant	Codel
CGGA_J030	Primary	OA	WHO II	Male	38	2775	0	1	0	Mutant	Codel
CGGA_J024	Recurrent	rA	WHO II	Female	29	2801	0	0	0	Mutant	Non-codel
CGGA_42	Primary	A	WHO II	Male	38	2832	1	1	1	Mutant	Codel
CGGA_1071	Primary	A	WHO II	Male	42	2876	0	1	0	Wildtype	Non-codel
CGGA_269	Primary	A	WHO II	Female	45	2932	0	1	0	Wildtype	Non-codel
CGGA_1030	Primary	OA	WHO II	Female	40	2934	0	1	1	Mutant	Non-codel
CGGA_1052	Primary	OA	WHO II	Male	41	2964	0	NA	NA	Mutant	Codel
CGGA_243	Primary	OA	WHO II	Female	30	2977	0	1	0	Mutant	Codel
CGGA_890	Primary	AA	WHO III	Male	39	2982	1	1	1	Mutant	Non-codel
CGGA_846	Recurrent	rA	WHO II	Female	39	2991	0	0	1	Wildtype	Non-codel
CGGA_320	Primary	OA	WHO II	Male	31	3005	1	1	1	Mutant	Codel
CGGA_1050	Primary	OA	WHO II	Male	39	3040	0	1	0	Mutant	Codel
CGGA_D52	Primary	AO	WHO III	Male	46	3057	0	1	1	Mutant	Codel
CGGA_D40	Recurrent	rOA	WHO II	Male	44	3085	0	0	0	Mutant	Non-codel
CGGA_1003	Primary	OA	WHO II	Female	47	3087	0	0	1	Mutant	Codel
CGGA_583	Primary	A	WHO II	Female	36	3107	1	1	0	Mutant	NA
CGGA_1012	Recurrent	rO	WHO II	Male	45	3116	0	1	1	Mutant	Non-codel
CGGA_893	Primary	OA	WHO II	Female	36	3160	1	1	0	Mutant	Non-codel
CGGA_D29	Primary	O	WHO II	Male	36	3171	0	1	0	Mutant	Codel
CGGA_905	Primary	A	WHO II	Male	46	3174	1	1	0	Mutant	Non-codel
CGGA_D27	Recurrent	rAOA	WHO III	Male	33	3178	0	1	1	Mutant	Codel
CGGA_D15	Primary	OA	WHO II	Female	38	3197	0	1	0	Mutant	Codel
CGGA_889	Primary	A	WHO II	Male	23	3213	0	1	1	Mutant	Non-codel
CGGA_685	Primary	A	WHO II	Female	20	3239	1	1	1	Mutant	Non-codel
CGGA_1022	Recurrent	rA	WHO II	Female	62	3265	0	0	1	Wildtype	Non-codel
CGGA_1005	Primary	A	WHO II	Female	41	3286	0	1	0	Mutant	Non-codel
CGGA_707	Primary	OA	WHO II	Female	39	3299	1	1	1	Mutant	Codel
CGGA_871	Primary	O	WHO II	Male	37	3340	0	1	0	Mutant	Codel
CGGA_864	Primary	OA	WHO II	Male	34	3353	0	1	0	Mutant	Codel
CGGA_858	Primary	O	WHO II	Male	42	3359	0	1	0	Mutant	Codel
CGGA_843	Primary	OA	WHO II	Male	29	3380	0	1	0	Mutant	Codel
CGGA_838	Primary	OA	WHO II	Female	36	3386	0	1	1	Mutant	Codel
CGGA_834	Primary	OA	WHO II	Male	24	3388	0	1	0	Wildtype	Non-codel
CGGA_818	Primary	A	WHO II	Male	46	3402	0	1	0	Mutant	Non-codel
CGGA_724	Recurrent	rOA	WHO II	Male	32	3406	0	0	0	Mutant	Non-codel
CGGA_812	Primary	O	WHO II	Male	27	3410	0	1	0	Mutant	Codel
CGGA_641	Primary	AO	WHO III	Female	51	3411	1	1	1	Mutant	Codel
CGGA_807	Primary	A	WHO II	Male	42	3415	0	1	1	Wildtype	Non-codel
CGGA_715	Primary	O	WHO II	Male	43	3429	0	1	0	Mutant	Codel
CGGA_909	Primary	OA	WHO II	Female	39	3448	0	NA	0	Mutant	Non-codel
CGGA_785	Primary	O	WHO II	Male	43	3457	0	1	0	Mutant	Codel
CGGA_283	Primary	O	WHO II	Female	47	3470	1	1	1	Mutant	Codel
CGGA_766	Primary	OA	WHO II	Male	32	3472	0	1	0	Mutant	Codel
CGGA_762	Primary	OA	WHO II	Female	40	3474	0	1	0	Mutant	Codel
CGGA_663	Primary	A	WHO II	Female	29	3479	0	1	0	Mutant	Non-codel
CGGA_760	Primary	O	WHO II	Female	34	3479	0	1	0	Mutant	Codel
CGGA_752	Primary	OA	WHO II	Male	39	3486	0	1	0	Mutant	Codel
CGGA_738	Primary	A	WHO II	Male	43	3501	0	1	0	Mutant	Non-codel
CGGA_420	Recurrent	rAO	WHO III	Female	39	3514	0	1	1	Mutant	Codel
CGGA_725	Primary	OA	WHO II	Male	58	3558	0	1	0	Mutant	Codel
CGGA_689	Primary	O	WHO II	Female	36	3563	0	1	0	Mutant	Codel
CGGA_675	Primary	OA	WHO II	Female	23	3579	0	1	0	Mutant	Codel
CGGA_671	Primary	OA	WHO II	Female	36	3584	0	1	0	Mutant	Codel
CGGA_655	Primary	O	WHO II	Male	35	3600	0	1	0	Mutant	Codel
CGGA_565	Primary	AOA	WHO III	Male	51	3605	0	1	1	Wildtype	Non-codel
CGGA_642	Primary	A	WHO II	Male	29	3618	0	1	0	Mutant	Non-codel
CGGA_635	Primary	OA	WHO II	Male	45	3631	0	1	1	Mutant	Codel
CGGA_630	Recurrent	rAO	WHO III	Male	43	3668	0	1	0	Mutant	Codel
CGGA_605	Recurrent	rAO	WHO III	Male	43	3668	0	1	1	Mutant	Non-codel
CGGA_598	Primary	AO	WHO III	Female	61	3677	1	1	1	Mutant	Codel
CGGA_560	Primary	AOA	WHO III	Male	43	3722	0	1	0	Mutant	Non-codel
CGGA_551	Primary	O	WHO II	Male	44	3728	0	1	0	Mutant	Codel
CGGA_543	Primary	O	WHO II	Male	43	3736	0	1	0	Mutant	Codel
CGGA_541	Primary	OA	WHO II	Female	36	3741	0	1	1	Wildtype	Non-codel
CGGA_510	Primary	AO	WHO III	Male	42	3770	0	1	1	Mutant	Codel
CGGA_503	Primary	OA	WHO II	Male	51	3777	0	1	1	Mutant	Non-codel
CGGA_502	Primary	A	WHO II	Male	39	3781	0	1	0	Mutant	Non-codel
CGGA_501	Primary	O	WHO II	Male	40	3798	0	1	0	Mutant	Codel
CGGA_490	Primary	AO	WHO III	Female	37	3804	0	1	1	Mutant	Codel
CGGA_479	Primary	OA	WHO II	Female	36	3812	0	1	0	Mutant	Codel
CGGA_446	Primary	O	WHO II	Female	35	3860	0	1	0	Mutant	Codel
CGGA_431	Recurrent	rAOA	WHO III	Male	41	3866	0	1	1	Mutant	Codel
CGGA_369	Recurrent	rA	WHO II	Male	33	3957	0	1	0	Mutant	Non-codel
CGGA_265	Recurrent	rA	WHO II	Male	43	3959	0	1	1	Mutant	Non-codel
CGGA_323	Primary	O	WHO II	Female	48	4023	0	0	0	Wildtype	Non-codel
CGGA_290	Primary	OA	WHO II	Female	37	4075	0	1	0	Mutant	Codel
CGGA_D61	Primary	AO	WHO III	Male	40	4089	0	1	1	Mutant	NA
CGGA_261	Primary	A	WHO II	Male	27	4130	0	1	0	Mutant	Non-codel
CGGA_254	Primary	OA	WHO II	Male	38	4143	0	1	1	Mutant	Codel
CGGA_241	Primary	OA	WHO II	Male	34	4163	0	1	0	Mutant	Non-codel
CGGA_106	Recurrent	rA	WHO II	Male	30	4374	0	0	1	Wildtype	Non-codel

## Sheet: Rembrandt
Rembrandt_ID	Histology	Grade	Gender	Age	OS (day)	Censor
E09860_U133P2	O	WHO II	Female	35-39	1105	0
E09867_U133P2	O	WHO II	Female	60-64	1160	0
E09804_U133P2	O	WHO II	Female	30-34	1273	0
E09661_U133P2	O	WHO II	Male	35-39	1454	0
HF1677_U133P2	A	WHO II	Male	50-54	1905	0
HF1708_U133P2	A	WHO II	Male	20-24	2033	0
HF1551_U133P2	A	WHO II	Female	30-34	2127	0
HF1606_U133P2	A	WHO II	Male	60-64	2209	0
HF1588_U133P2	A	WHO II	Male	40-44	2257	0
HF1345_U133P2	A	WHO II	Female	15-19	2505	0
HF1325_U133P2	A	WHO II	Female	35-39	2535	0
HF0802_U133P2	A	WHO II	NA	30-34	2641	0
HF0726_U133P2	A	WHO II	Male	35-39	2682	0
HF0670_U133P2	A	WHO II	Male	50-54	2890	0
HF1235_U133P2	A	WHO II	Male	35-39	2951	0
HF1156_U133P2	A	WHO II	Female	30-34	3160	0
HF0962_U133P2	O	WHO II	Male	30-34	3495	0
HF0931_U133P2	A	WHO II	Female	35-39	3570	0
HF0252_U133P2_2	A	WHO II	Male	NA	3693	0
E09358_U133P2	MIXED	WHO II	Female	50-54	3814	0
HF0022_U133P2	A	WHO II	Male	20-24	4016	0
HF1381_U133P2	A	WHO II	Male	25-29	4086	0
HF0914_U133P2	A	WHO II	Male	40-44	4407	0
E09673_U133P2	A	WHO II	Male	45-49	6415	0
HF1227_U133P2	O	WHO II	Female	25-29	7552	0
HF1246_U133P2	A	WHO II	Male	65-69	6	1
HF0920_U133P2	O	WHO II	Female	85-89	30	1
HF0936_U133P2	A	WHO II	Male	55-59	152	1
HF1407_U133P2	A	WHO II	Female	55-59	155	1
HF0434_U133P2	A	WHO II	Male	60-64	183	1
HF1316_U133P2	A	WHO II	Female	70-74	207	1
HF0778_U133P2	A	WHO II	NA	65-69	242	1
HF1344_U133P2	A	WHO II	NA	60-64	269	1
HF1487_U133P2	O	WHO II	NA	60-64	298	1
HF0608_U133P2	A	WHO II	Male	50-54	317	1
HF0855_U133P2	A	WHO II	Male	55-59	411	1
HF0285_U133P2	O	WHO II	Male	60-64	432	1
HF0982_U133P2	A	WHO II	Male	65-69	457	1
HF1167_U133P2	O	WHO II	Male	45-49	537	1
HF0327_U133P2	O	WHO II	Male	70-74	587	1
HF0510_U133P2	O	WHO II	NA	70-74	587	1
E09471_U133P2	A	WHO II	Male	70-74	815	1
HF0450_U133P2	A	WHO II	NA	30-34	885	1
HF1000_U133P2	A	WHO II	Male	30-34	1209	1
HF1568_U133P2	A	WHO II	Female	30-34	1278	1
HF0599_U133P2	O	WHO II	NA	50-54	1284	1
HF0223_U133P2	A	WHO II	Male	45-49	1292	1
HF0953_U133P2_2	A	WHO II	Male	NA	1337	1
HF0835_U133P2	O	WHO II	Female	35-39	1359	1
HF1442_U133P2	A	WHO II	Male	35-39	1416	1
HF0305_U133P2	A	WHO II	Male	30-34	1475	1
E09688_U133P2	MIXED	WHO II	Female	35-39	1525	1
HF1511_U133P2	A	WHO II	Male	25-29	1698	1
HF0026_U133P2	A	WHO II	Female	60-64	1712	1
HF0844_U133P2	A	WHO II	NA	30-34	1915	1
E10483_U133P2	A	WHO II	Male	25-29	1993	1
HF0899_U133P2	A	WHO II	Male	55-59	2001	1
HF1489_U133P2	A	WHO II	Female	50-54	2049	1
HF0316_U133P2	A	WHO II	Male	40-44	2201	1
HF0757_U133P2	A	WHO II	NA	40-44	2246	1
HF0606_U133P2	A	WHO II	NA	30-34	2303	1
HF0960_U133P2	O	WHO II	Female	30-34	2661	1
HF0291_U133P2	O	WHO II	NA	50-54	2836	1
HF1334_U133P2	A	WHO II	Female	20-24	3471	1
E09855_U133P2	AA	WHO III	Male	25-29	1153	0
HF1587_U133P2	AA	WHO III	Male	30-34	2258	0
HF1185_U133P2	AA	WHO III	Female	25-29	2856	0
HF0435_U133P2	AA	WHO III	NA	40-44	3315	0
E09681_U133P2	AO	WHO III	Female	35-39	3365	0
HF0152_U133P2	AA	WHO III	NA	30-34	3946	0
HF0108_U133P2	AA	WHO III	NA	35-39	3960	0
HF0017_U133P2	AA	WHO III	Male	45-49	3996	0
HF0966_U133P2	AA	WHO III	Male	50-54	4131	0
HF1581_U133P2	AA	WHO III	NA	65-69	7	1
HF1255_U133P2	AA	WHO III	Female	45-49	104	1
HF1490_U133P2	AA	WHO III	Male	65-69	120	1
HF1702_U133P2	AO	WHO III	Female	75-79	162	1
HF1502_U133P2	AO	WHO III	Female	35-39	192	1
HF0244_U133P2	AA	WHO III	Male	60-64	225	1
HF0089_U133P2	AA	WHO III	Female	65-69	237	1
HF1090_U133P2	AO	WHO III	NA	60-64	255	1
HF0702_U133P2	AA	WHO III	NA	50-54	256	1
E10001_U133P2	AO	WHO III	Male	25-29	261	1
HF1458_U133P2	AO	WHO III	Male	45-49	265	1
HF0460_U133P2	AO	WHO III	NA	55-59	321	1
HF0954.2_U133P2	AA	WHO III	NA	NA	329	1
HF0184_U133P2	AO	WHO III	NA	50-54	359	1
E09511_U133P2	MIXED	WHO III	Male	45-49	370	1
HF1409_U133P2	AA	WHO III	Male	50-54	381	1
HF1286_U133P2	AA	WHO III	NA	75-79	395	1
HF1280_U133P2	AA	WHO III	Female	40-44	473	1
E09966_U133P2	AA	WHO III	Female	55-59	532	1
HF1295_U133P2	AA	WHO III	Female	55-59	573	1
HF1186_U133P2	AA	WHO III	Male	30-34	603	1
HF1232_U133P2	AA	WHO III	Female	50-54	606	1
HF1150_U133P2	AA	WHO III	Male	70-74	636	1
HF0251_U133P2	AO	WHO III	NA	50-54	682	1
E09826_U133P2	AA	WHO III	Male	40-44	689	1
HF1057_U133P2	AO	WHO III	Female	60-64	735	1
HF1032_U133P2	AA	WHO III	Male	40-44	843	1
HF1357_U133P2	AO	WHO III	Male	20-24	924	1
HF1475_U133P2	AA	WHO III	Male	15-19	951	1
HF1494_U133P2	AA	WHO III	Male	30-34	1023	1
E09656_U133P2	AO	WHO III	Male	40-44	1024	1
HF0975_U133P2	AA	WHO III	NA	60-64	1096	1
HF1493_U133P2	AO	WHO III	Female	70-74	1257	1
E09801_U133P2	AA	WHO III	Male	30-34	1276	1
HF1136_U133P2	AA	WHO III	Female	35-39	1359	1
E09959_U133P2	AA	WHO III	Male	50-54	1393	1
HF0816_U133P2	AO	WHO III	NA	45-49	1401	1
E09394_U133P2	MIXED	WHO III	Male	35-39	1550	1
E09920_U133P2_2	AA	WHO III	Male	NA	1782	1
E09239_U133P2	AA	WHO III	Male	30-34	1899	1
E09988_U133P2	AO	WHO III	Male	20-24	1939	1
HF1613_U133P2	AA	WHO III	Male	35-39	2004	1
HF0087_U133P2	AA	WHO III	Female	60-64	2365	1
E08021_U133P2	AO	WHO III	Female	30-34	2446	1
E09334_U133P2	MIXED	WHO III	Male	40-44	2557	1
E09893_U133P2	AO	WHO III	Female	35-39	3356	1
HF1242_U133P2	AA	WHO III	Male	35-39	4470	1
E09448_U133P2	AO	WHO III	Female	40-44	6873	1
